# Supplementary material
Source: publisher figshare collection journal article supplement (https://tandf.figshare.com/articles/dataset/_/8255924)

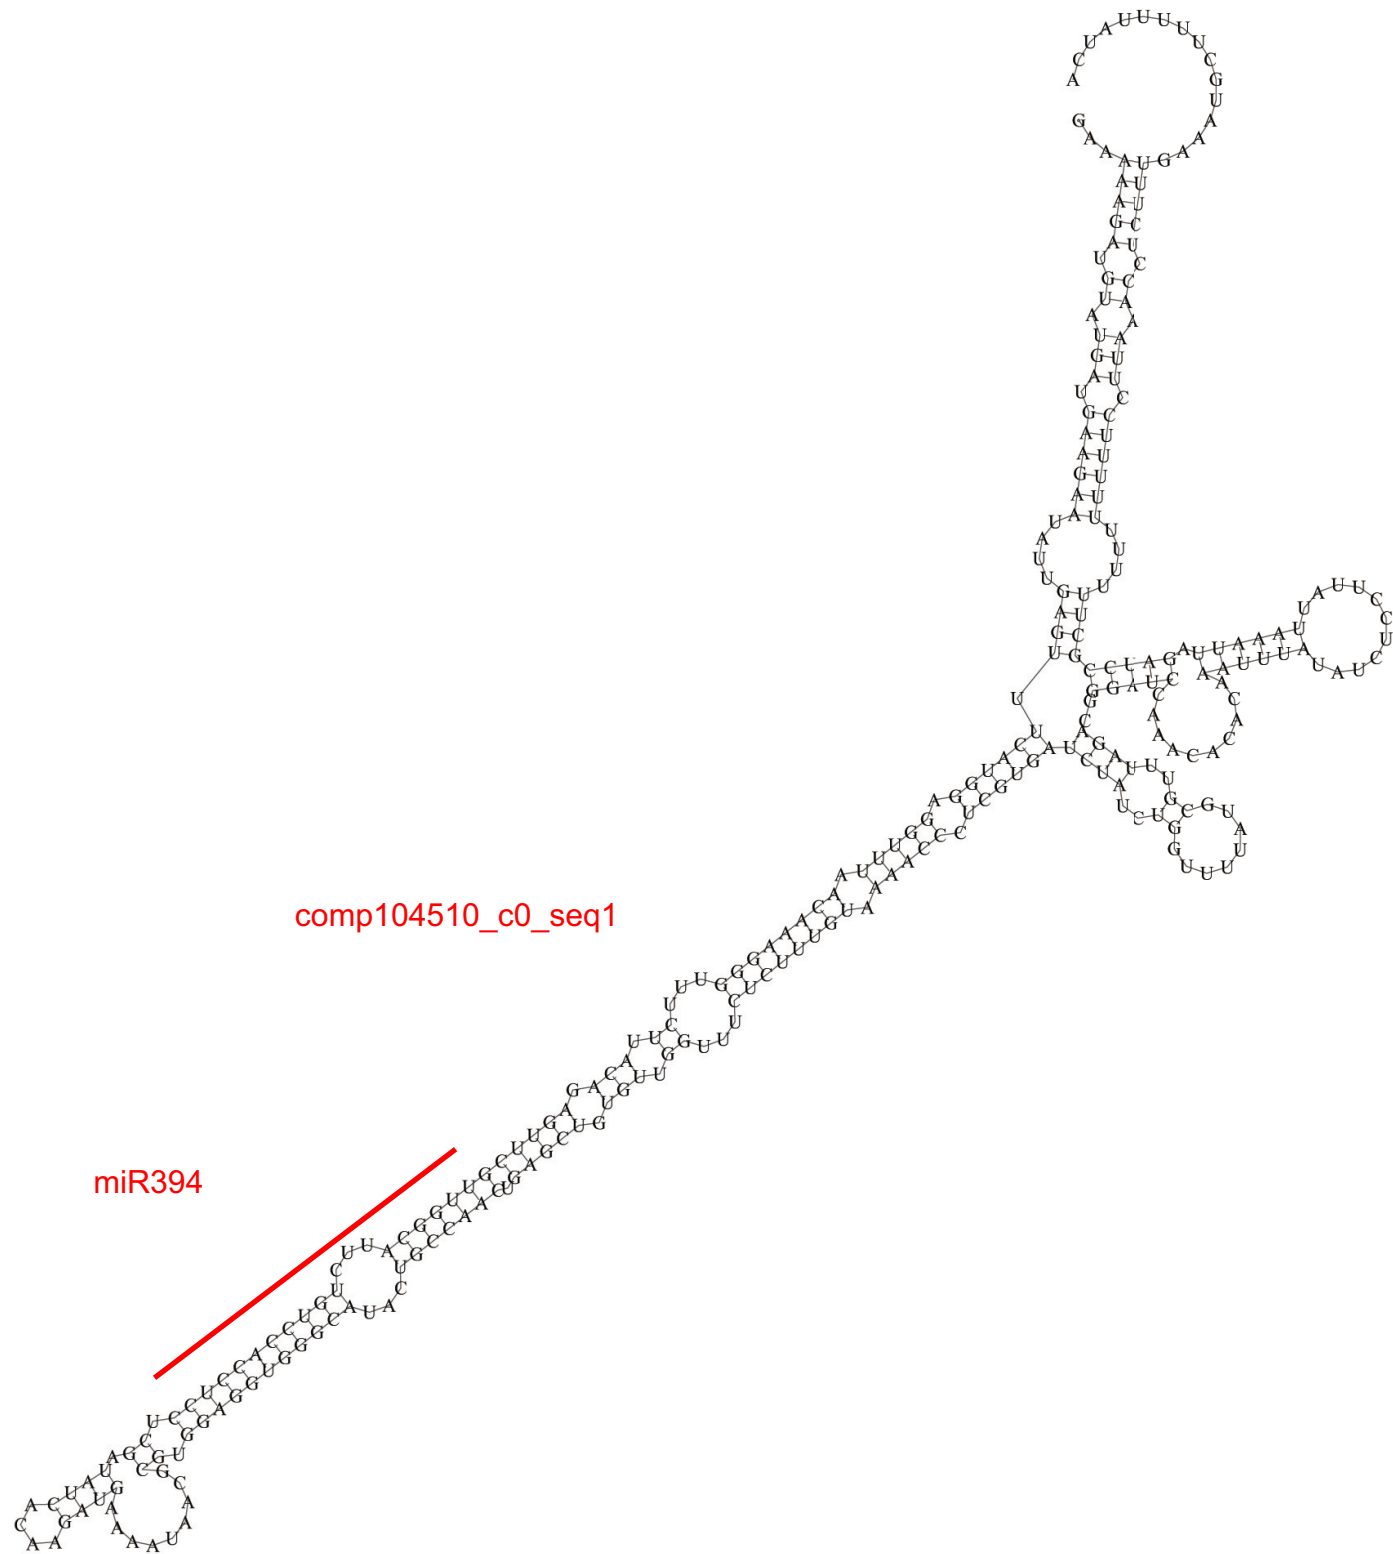

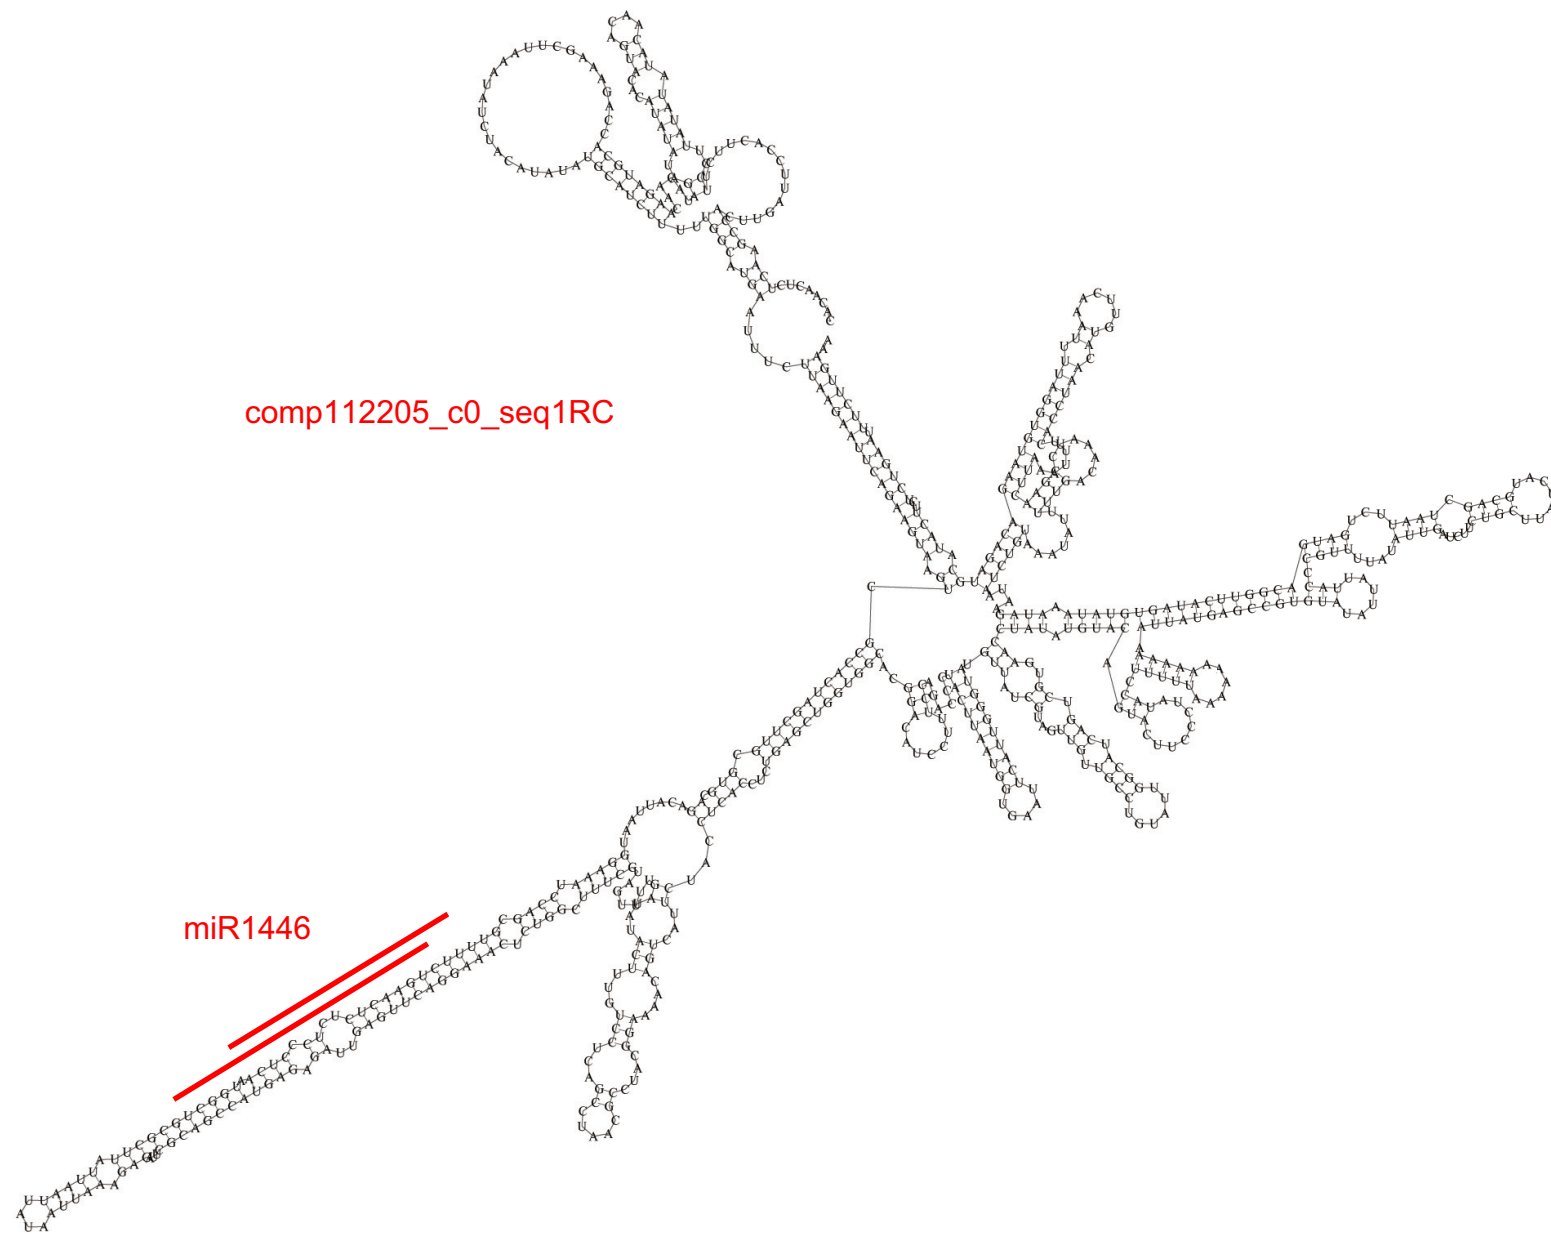

comp112205\_c0\_seq1RC

miR1446

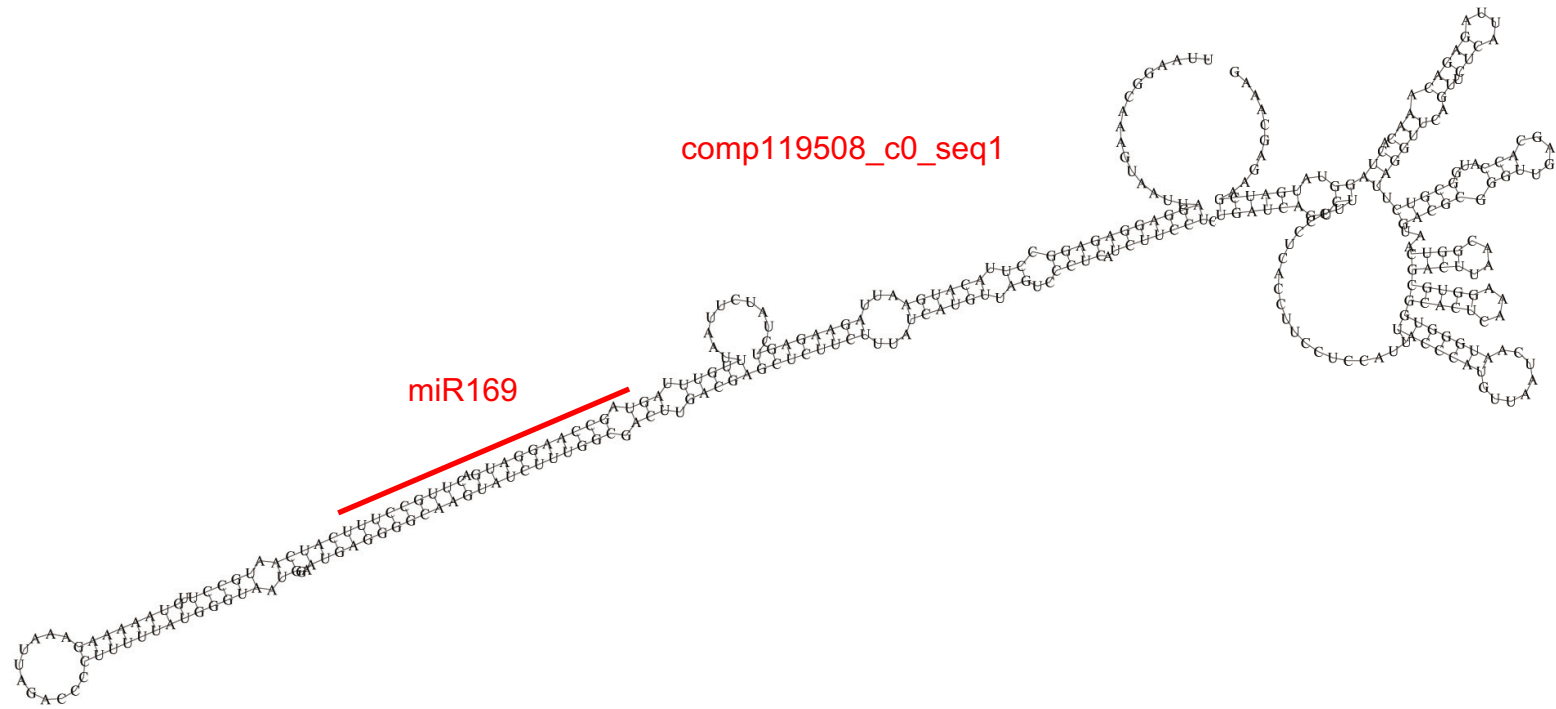

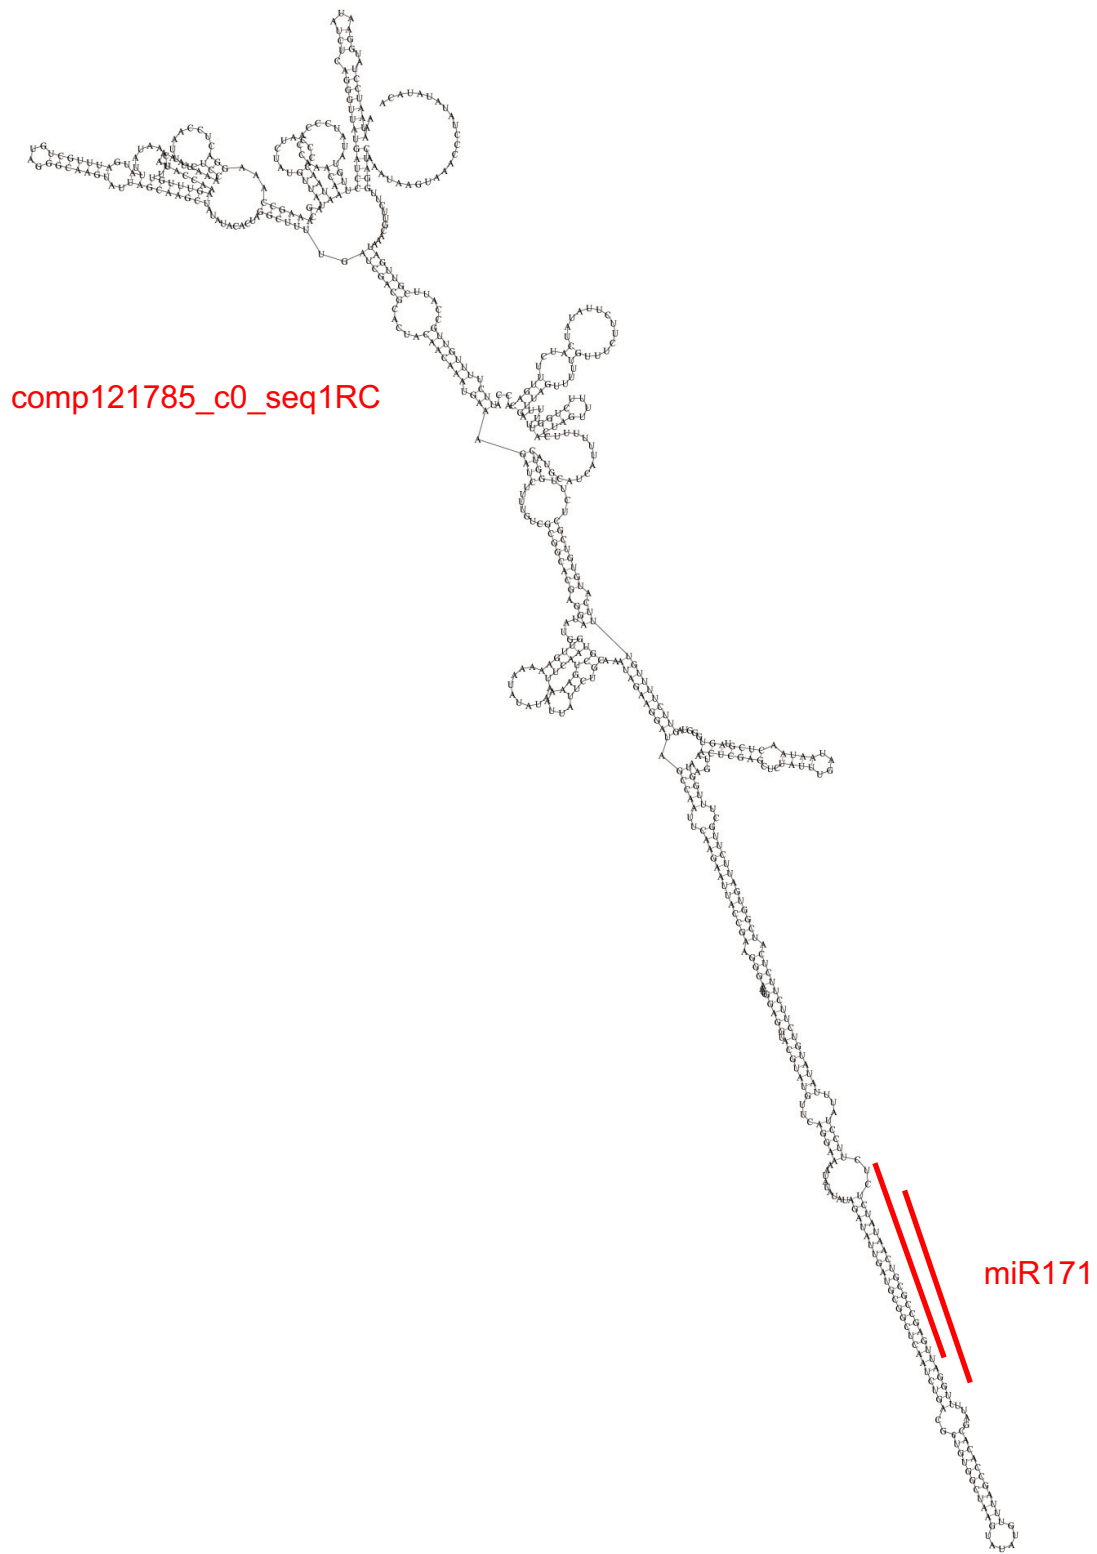

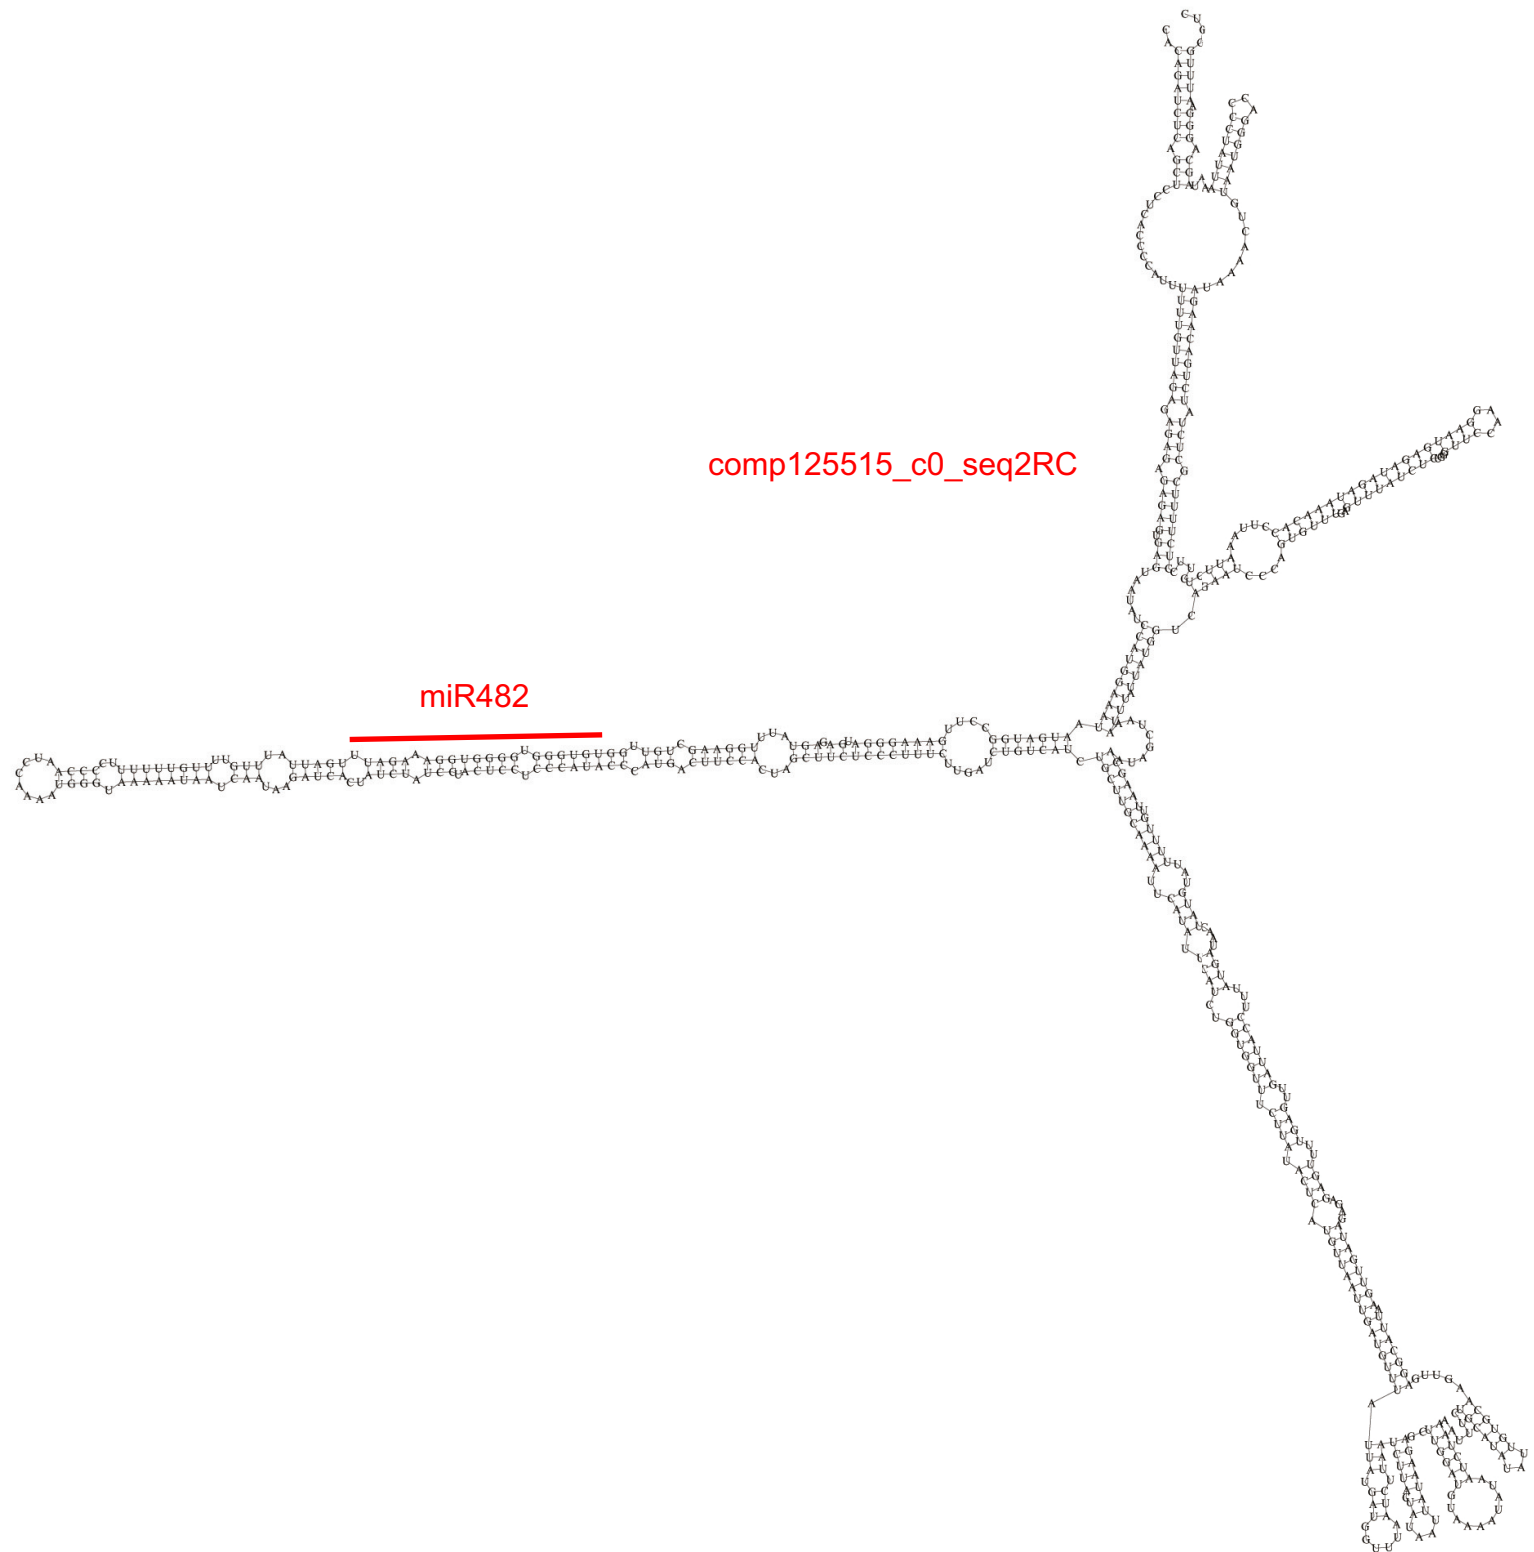

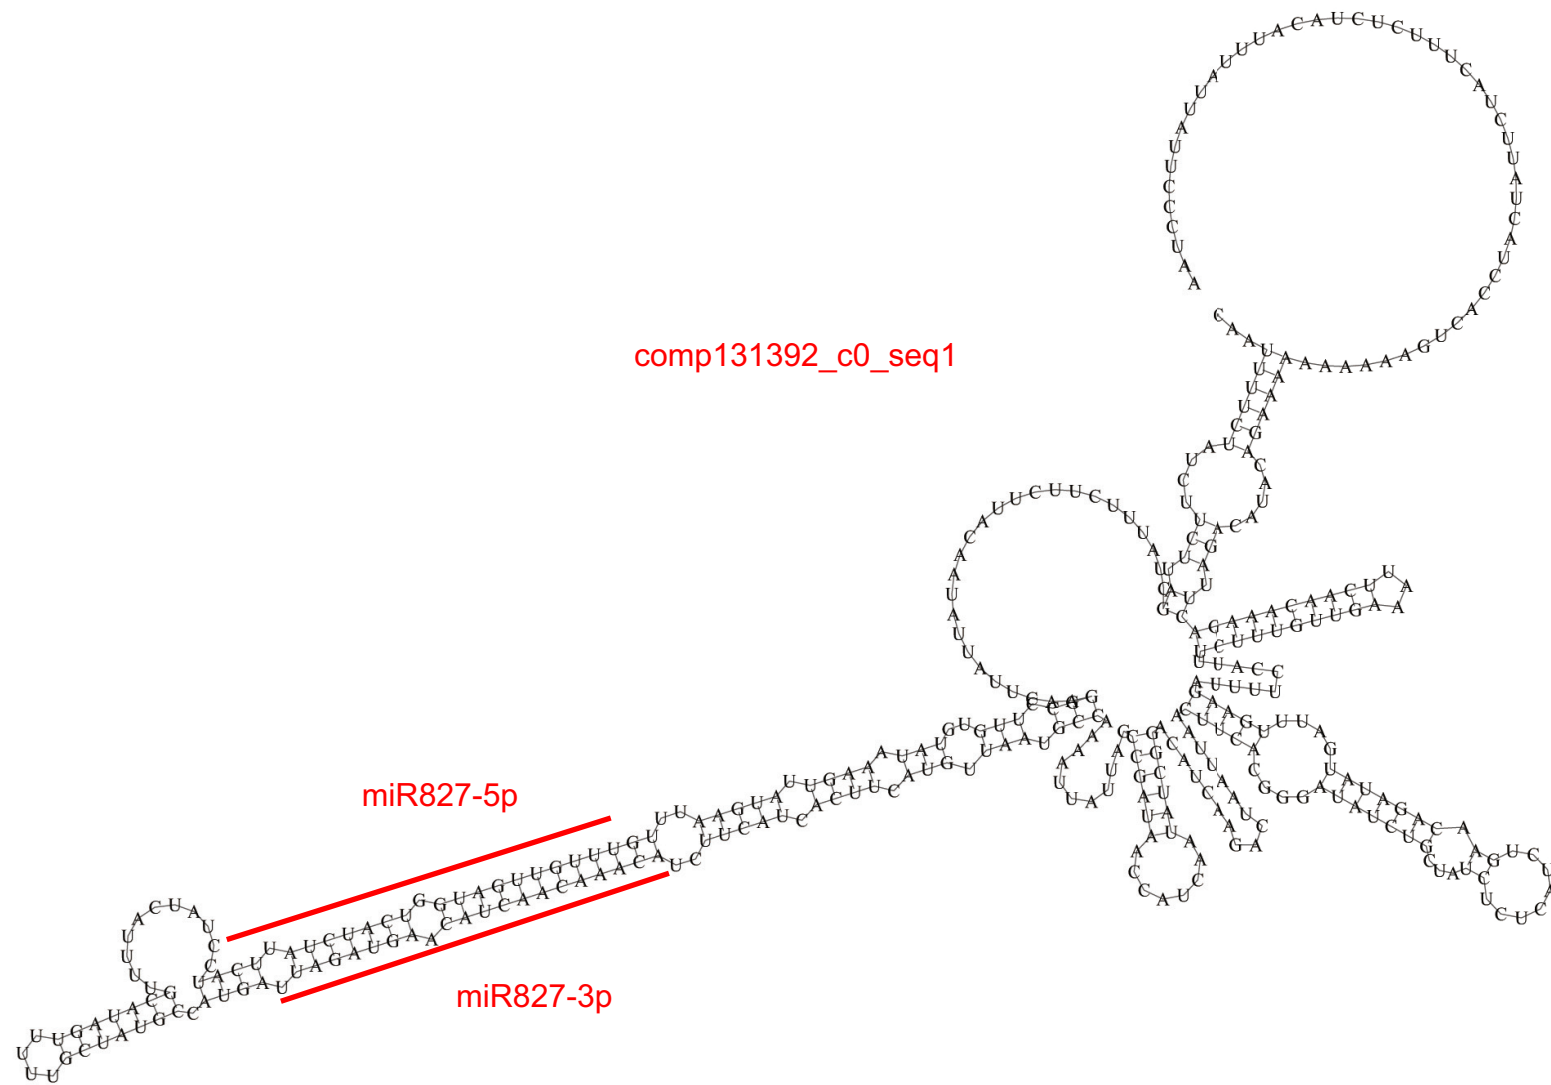

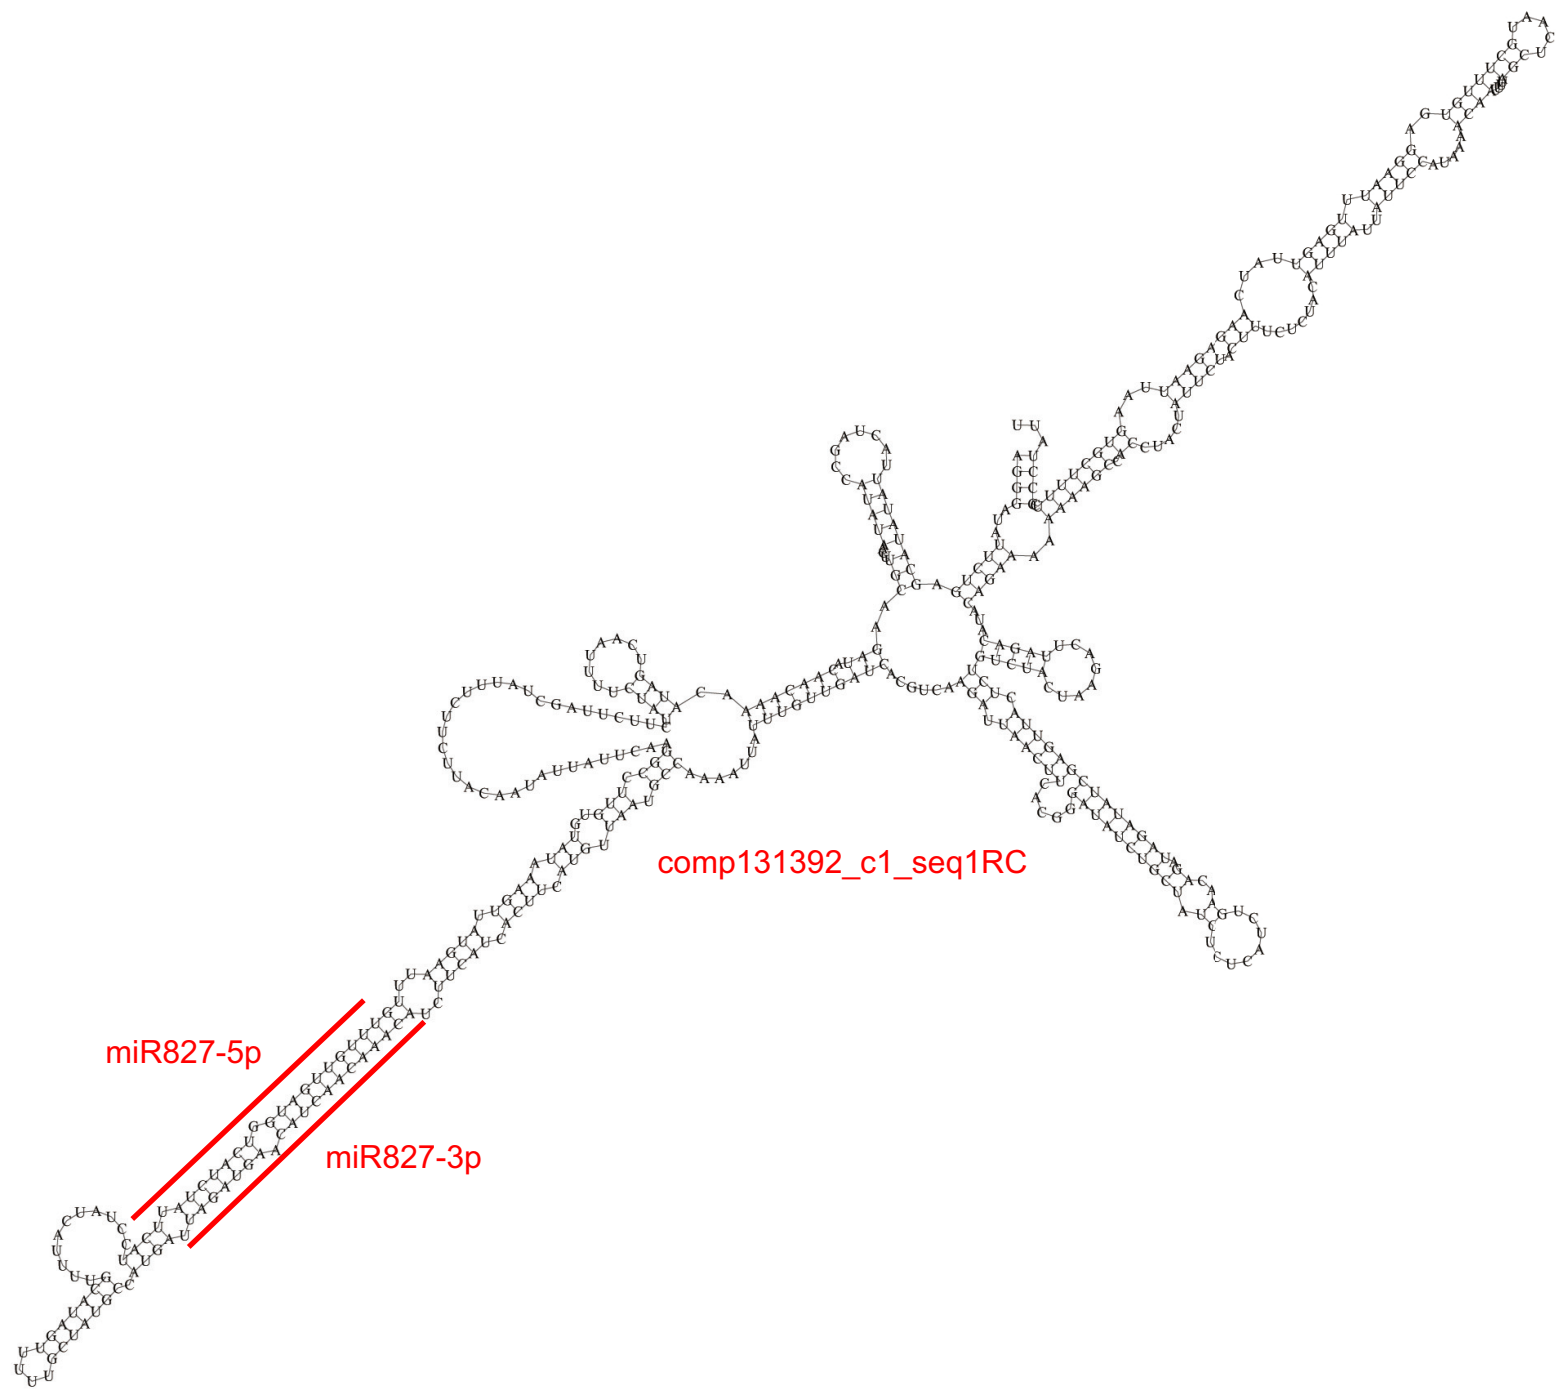

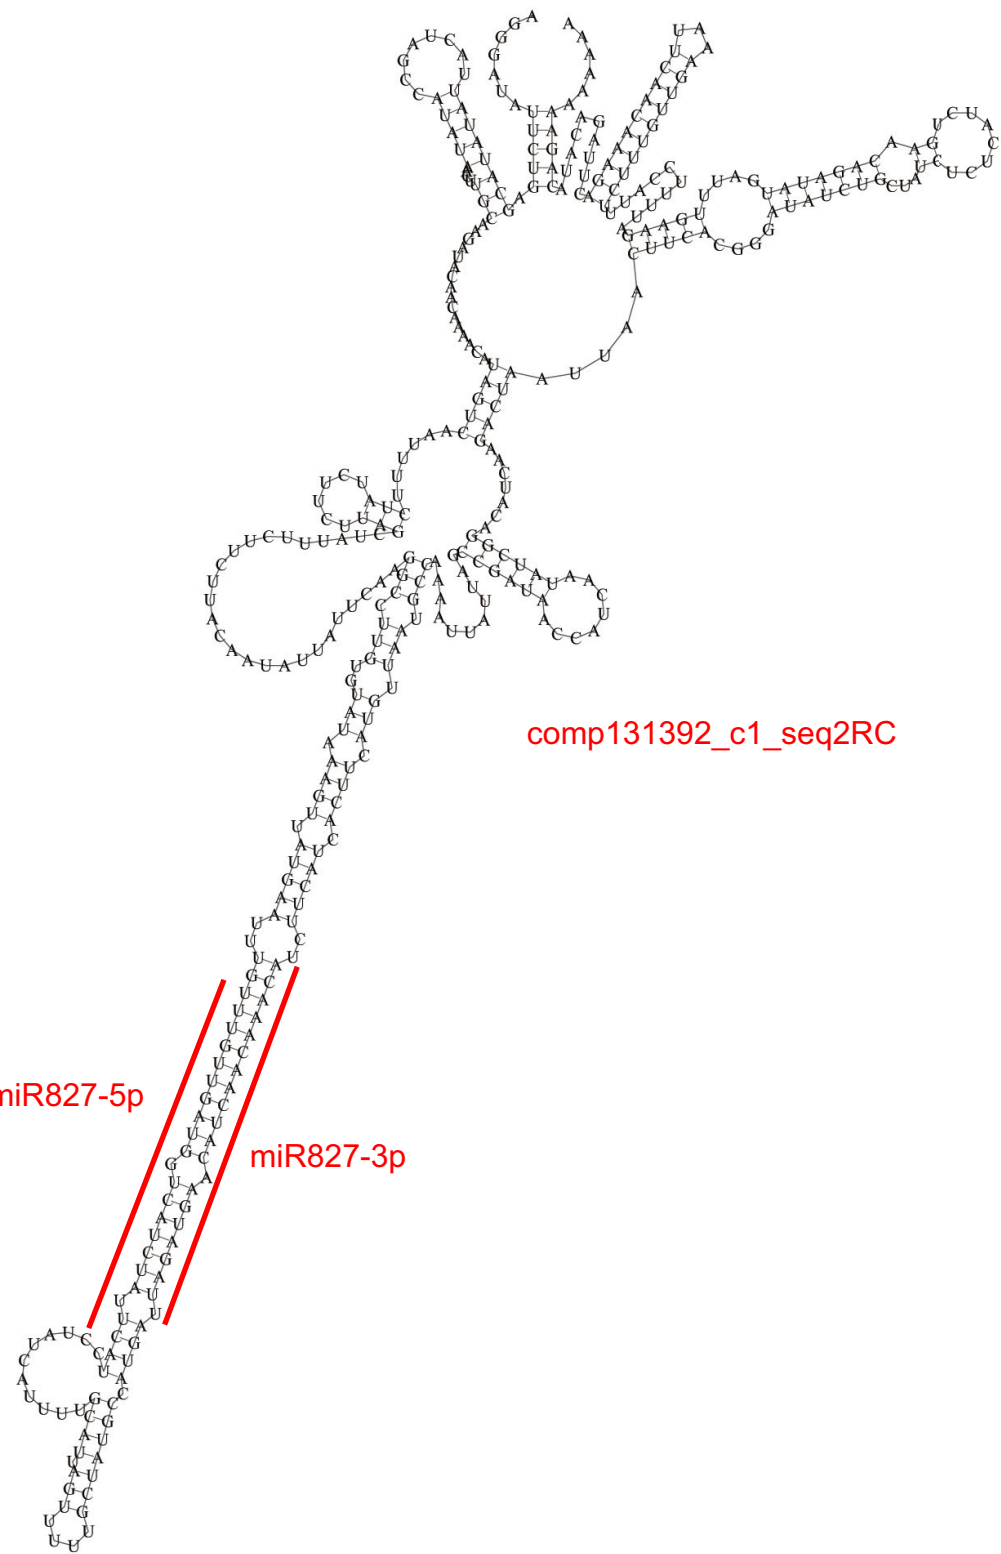

comp131392\_c1\_seq2RC



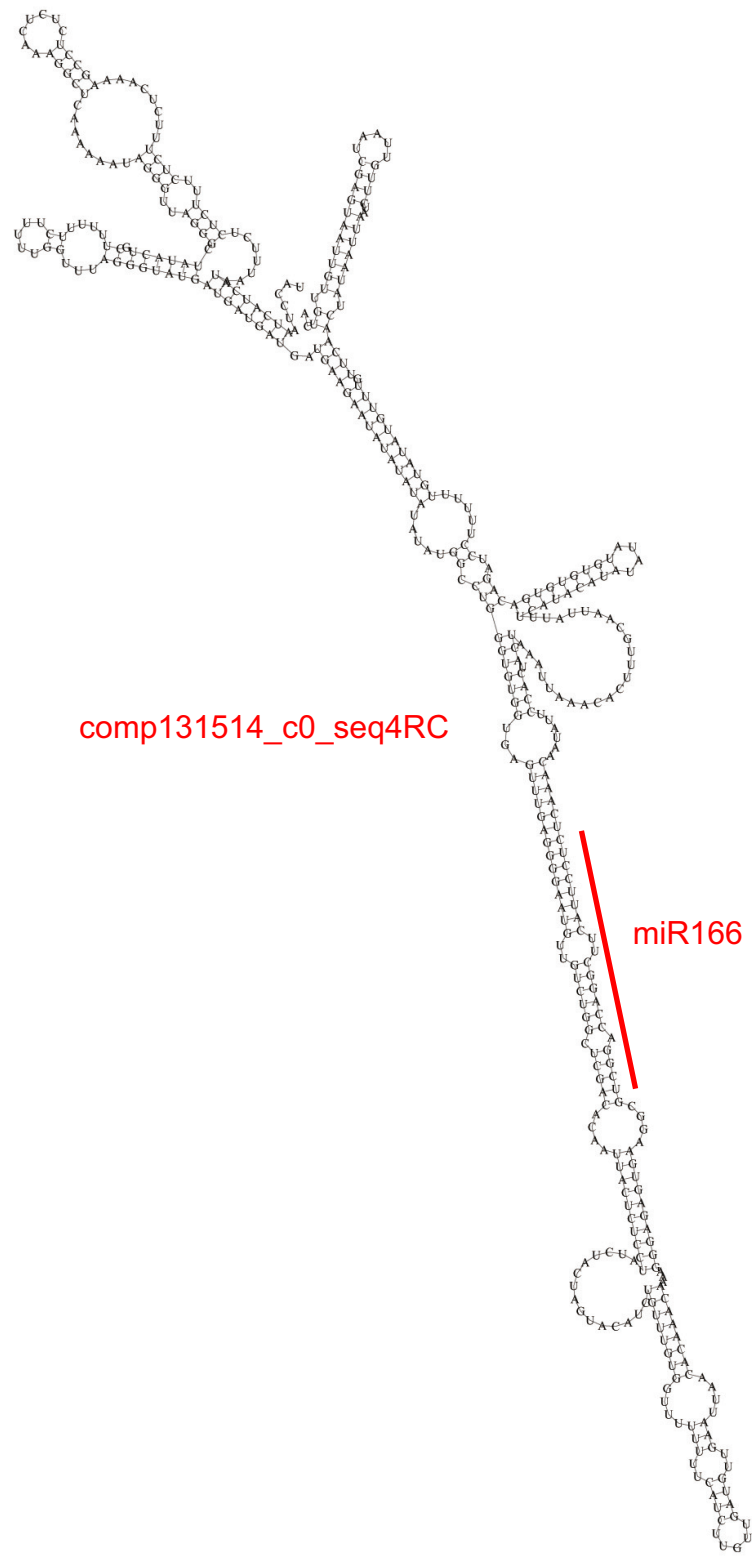

comp131514\_c0\_seq4RC

miR166

comp132128\_c0\_seq1

miR7997

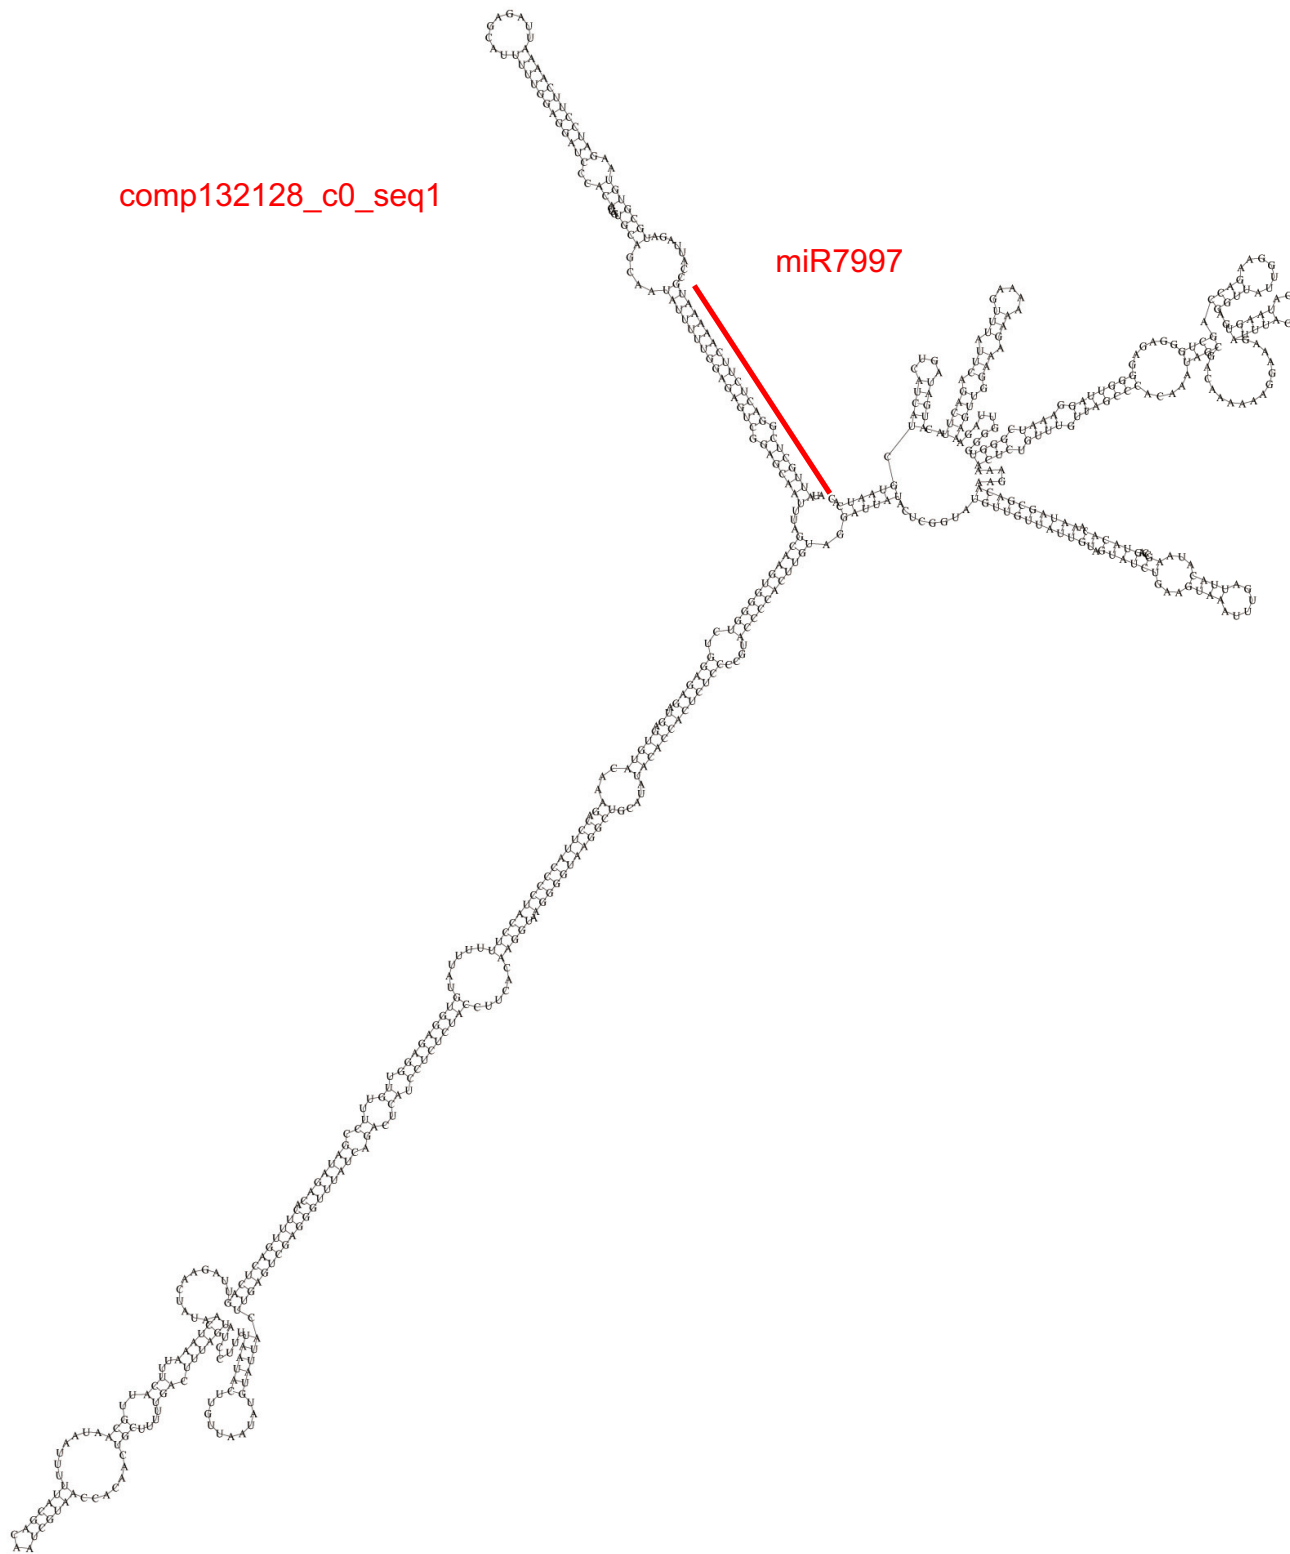

comp135375\_c0\_seq5RC

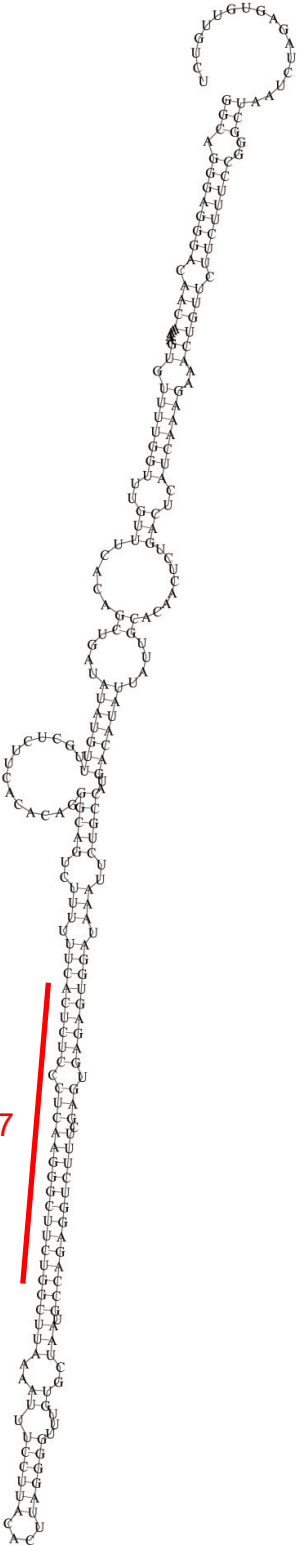

miR477

comp141616\_c0\_seq2

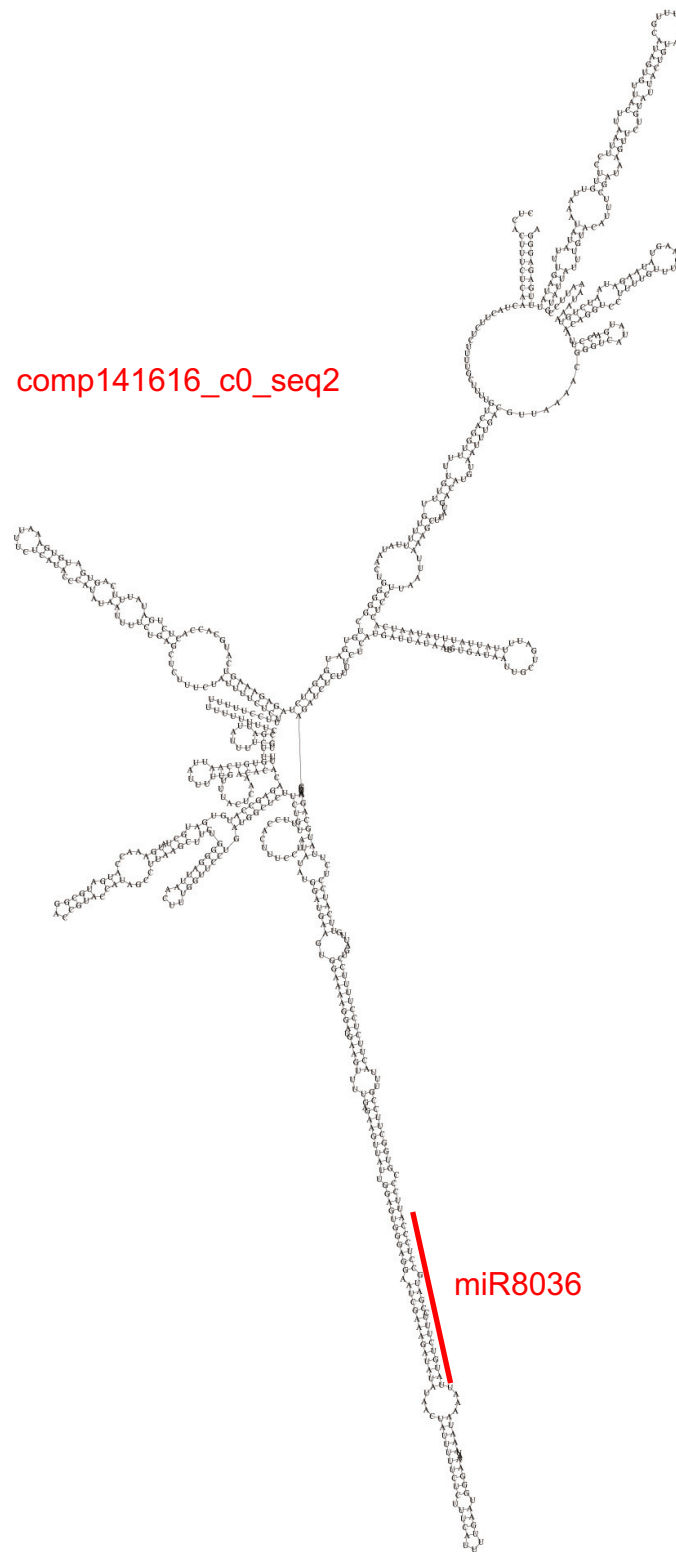

miR8036

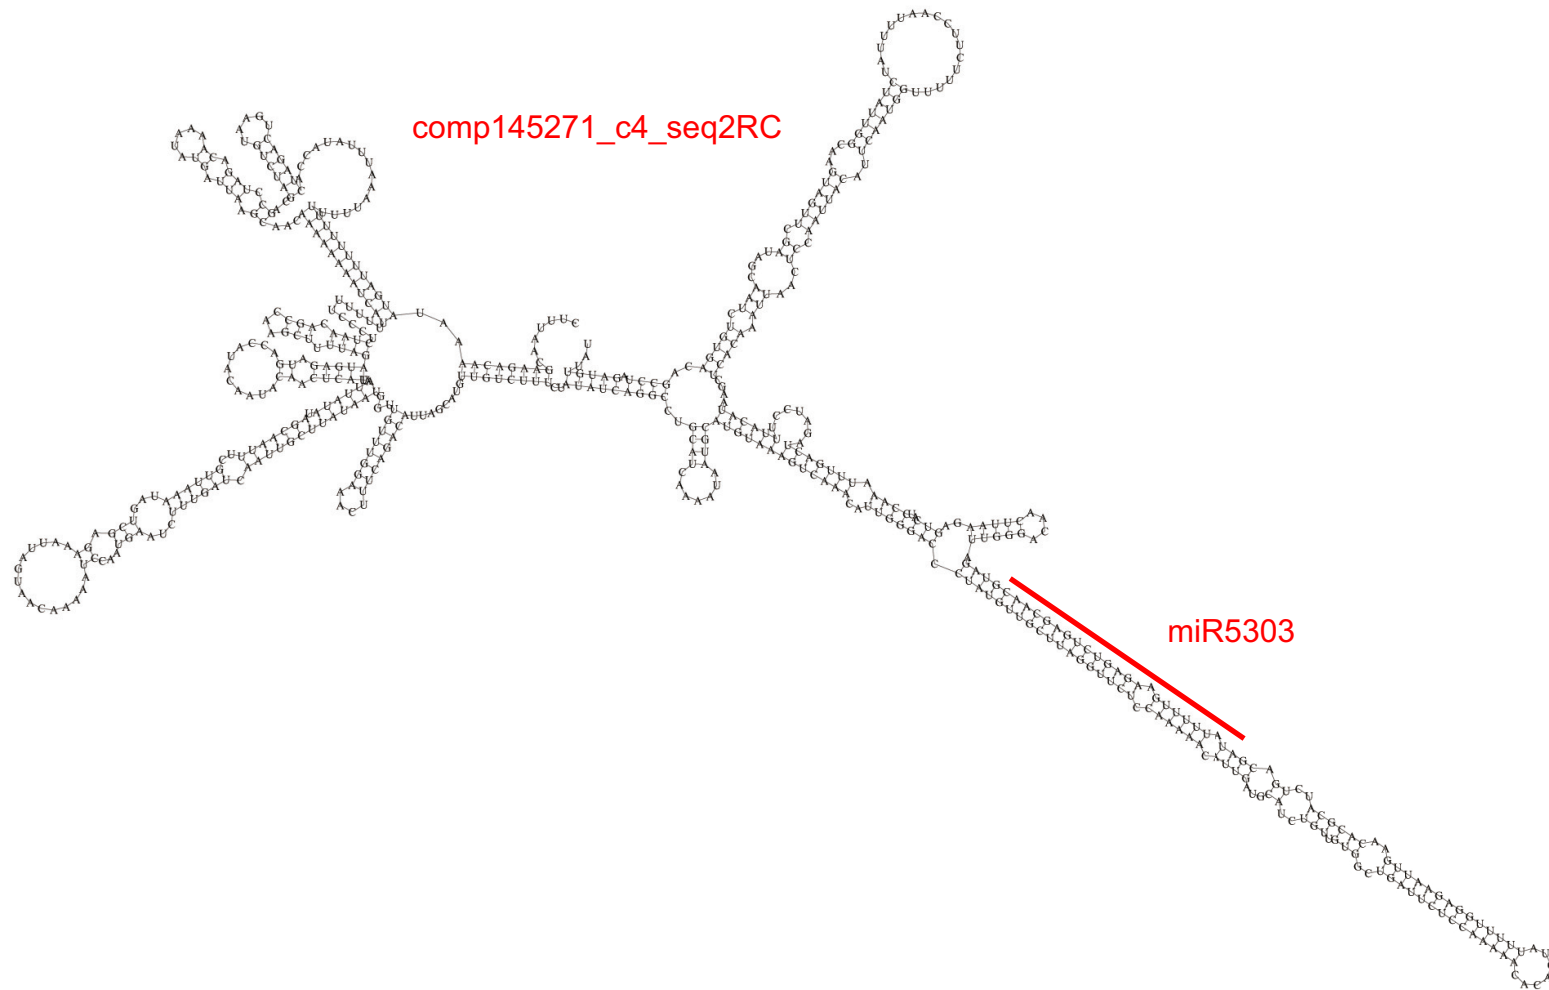

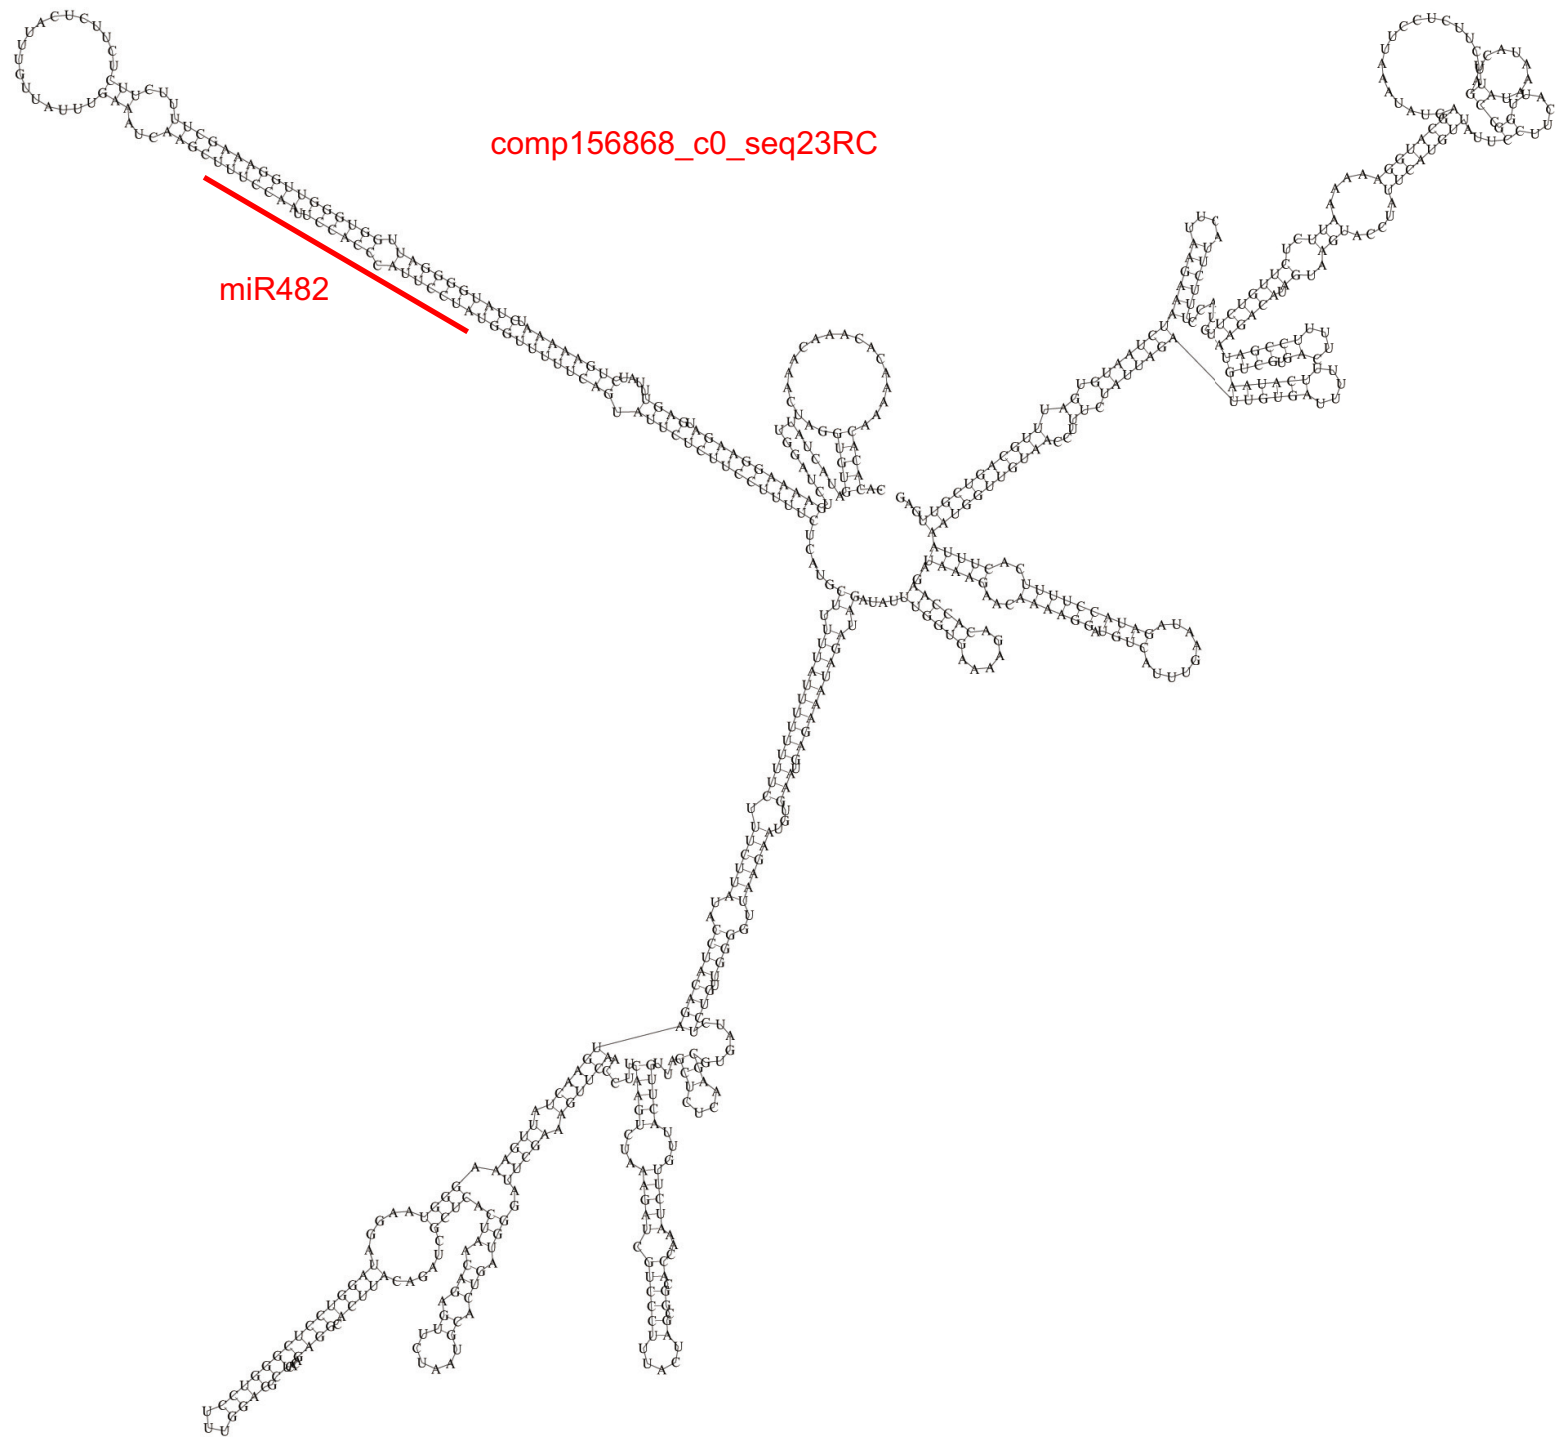

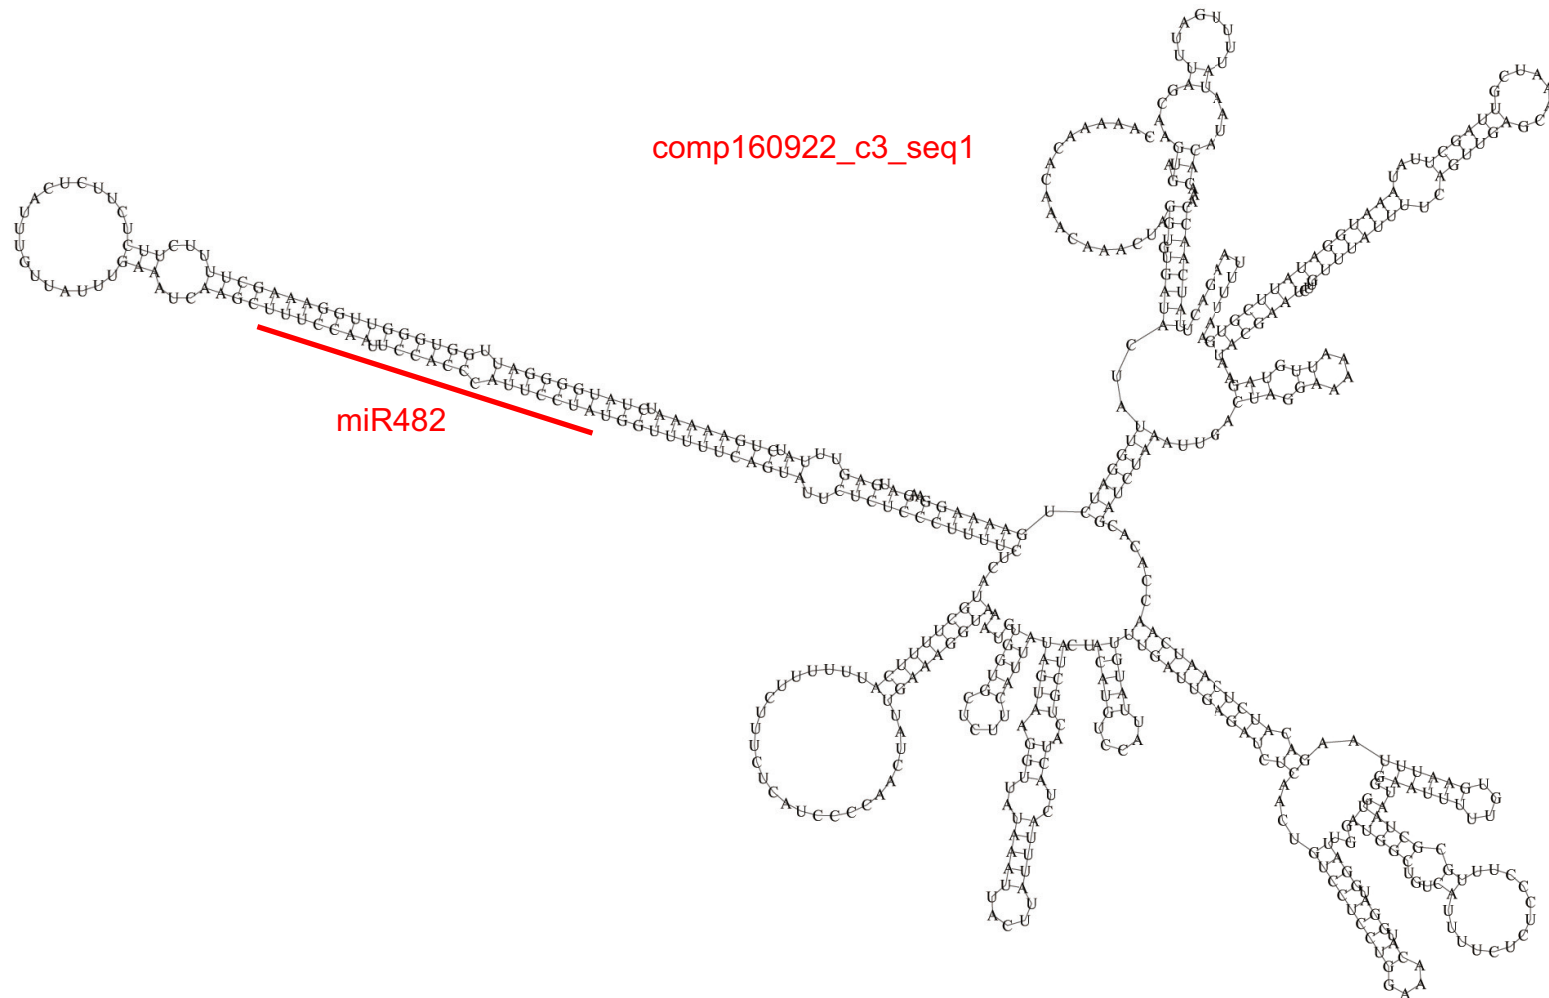

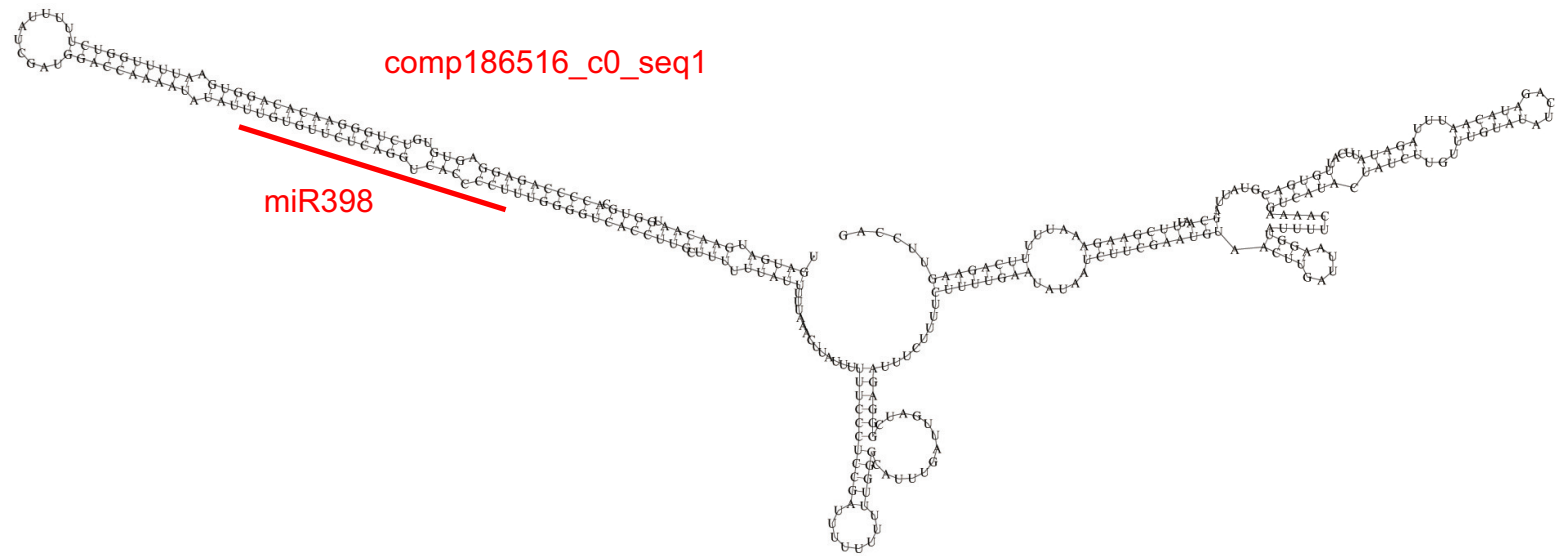



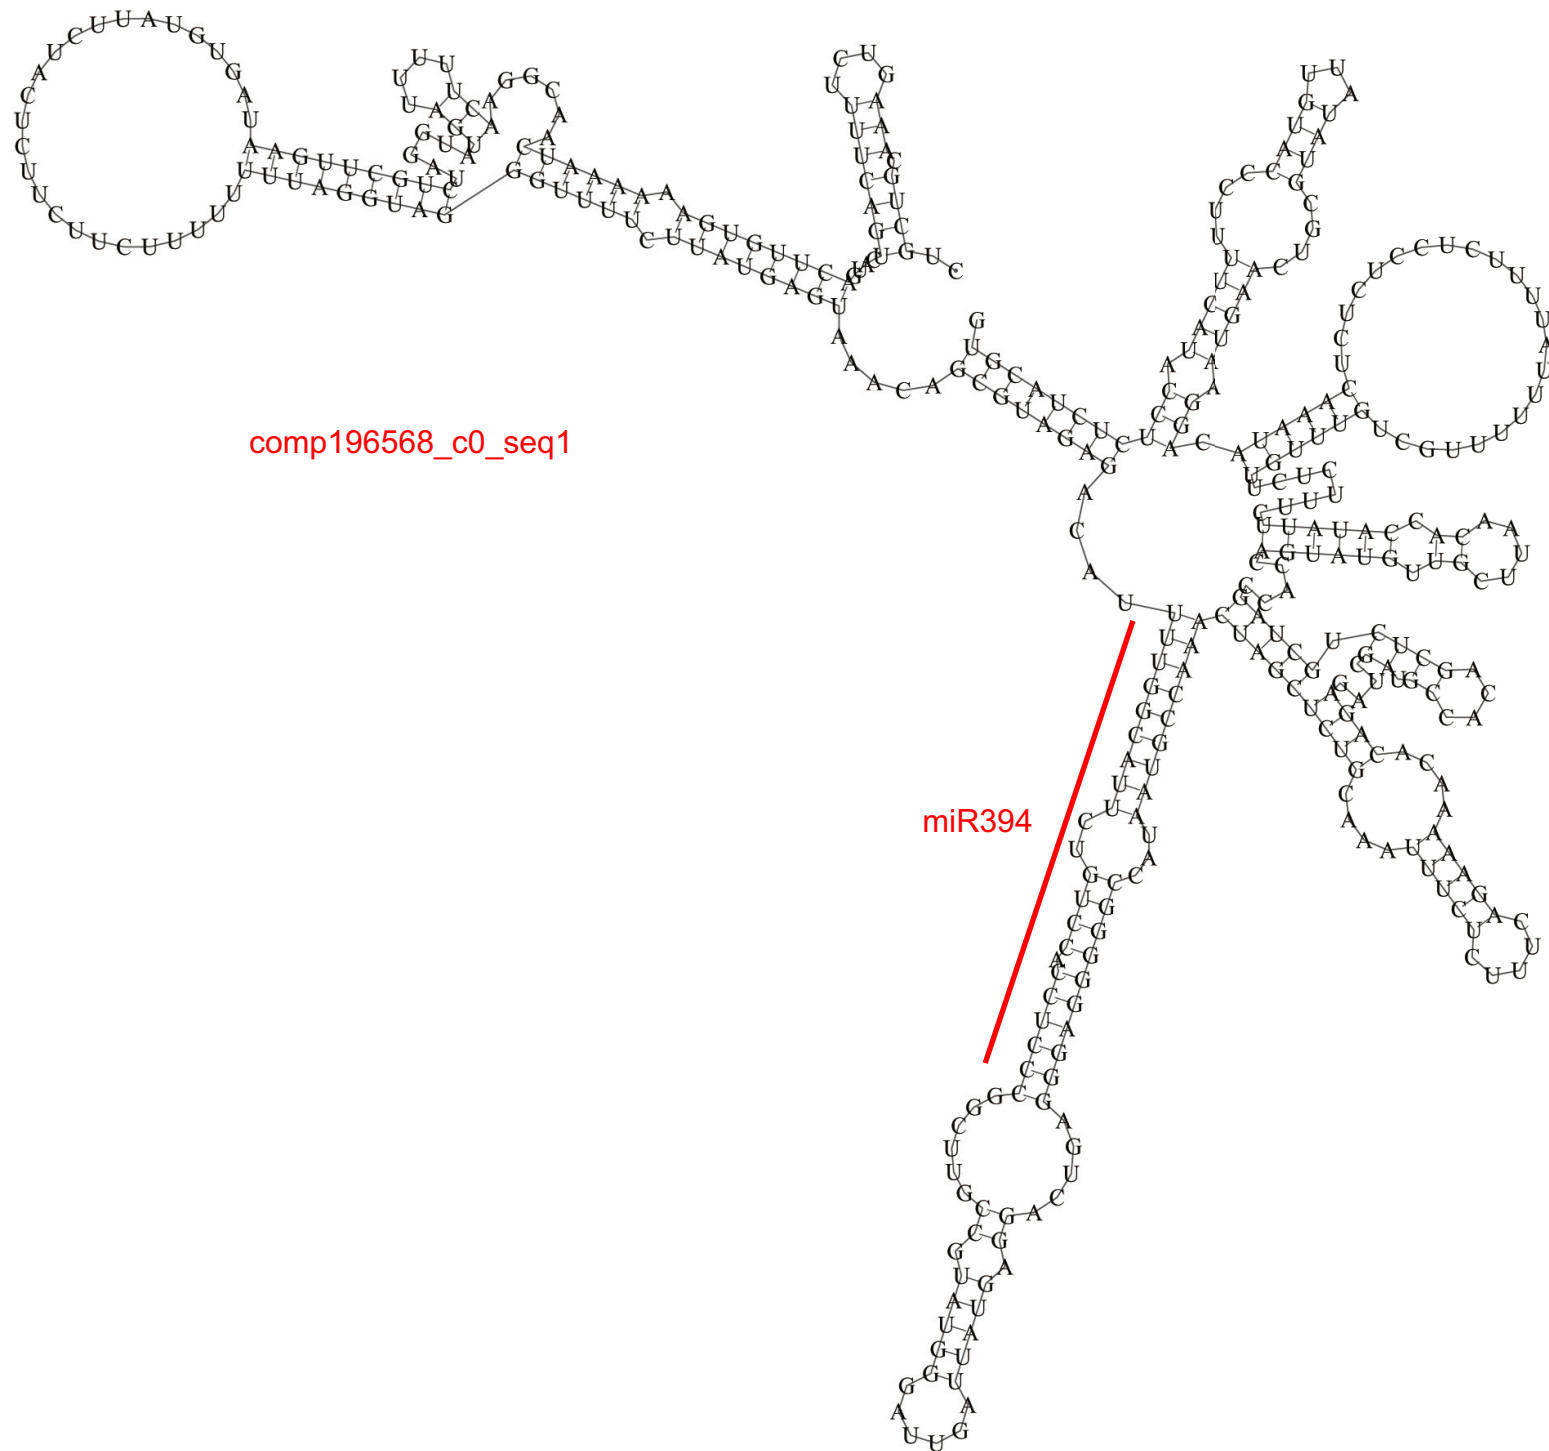

comp196568\_c0\_seq1

miR394

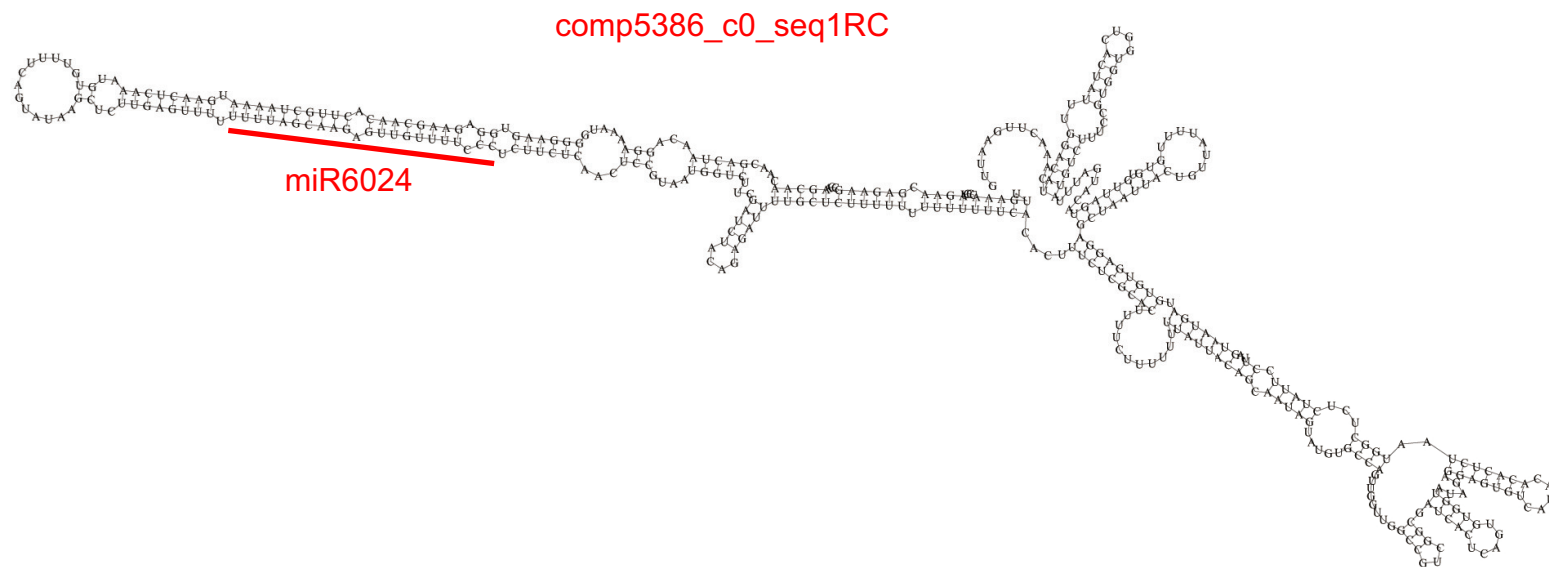

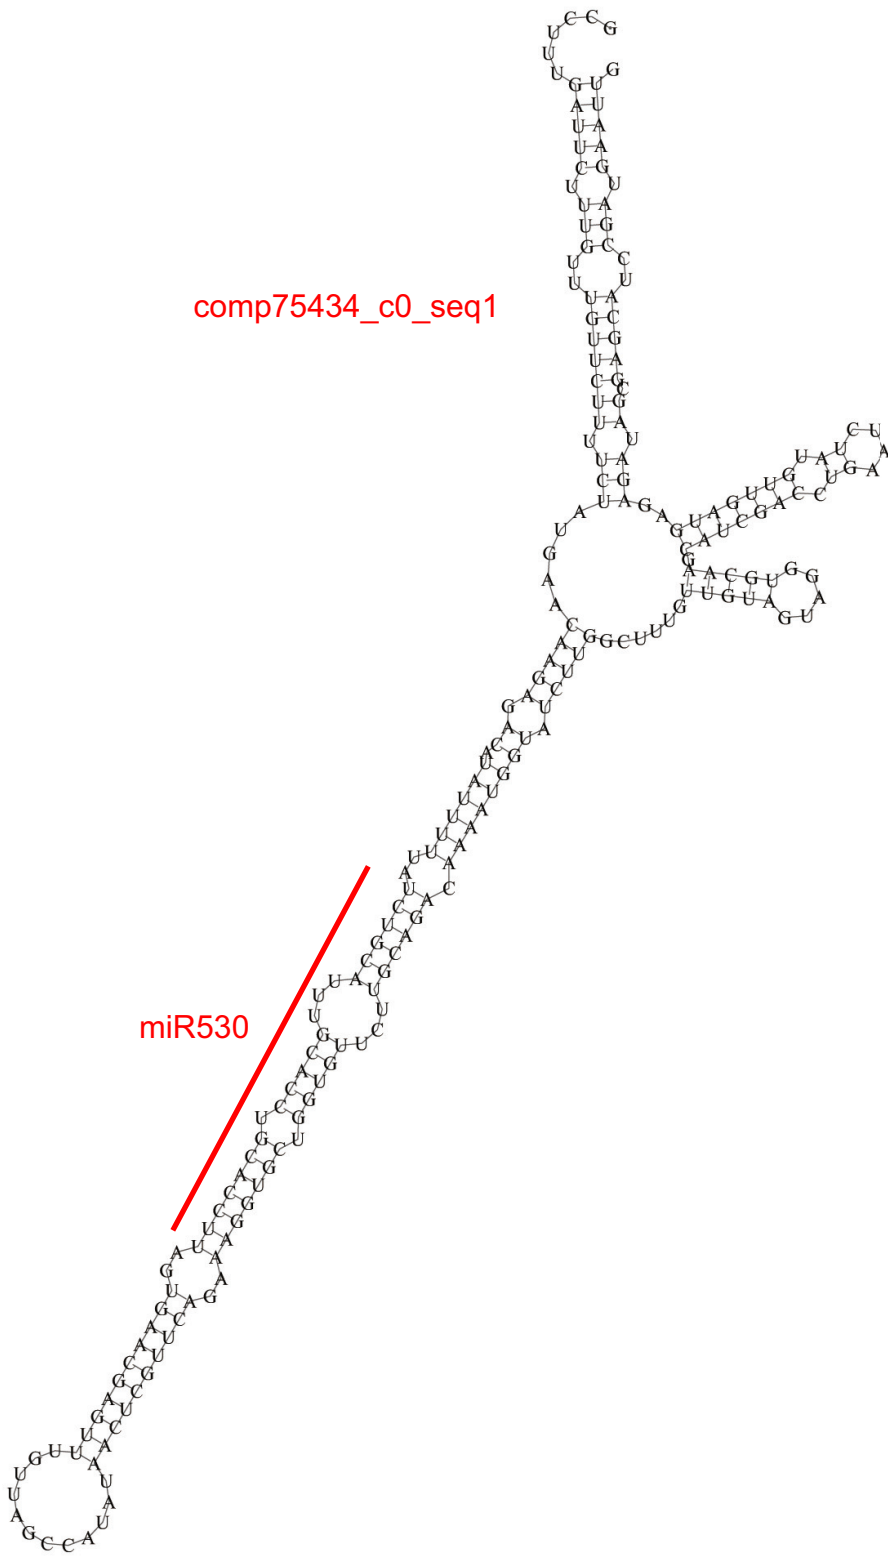

comp75434\_c0\_seq1

miR530

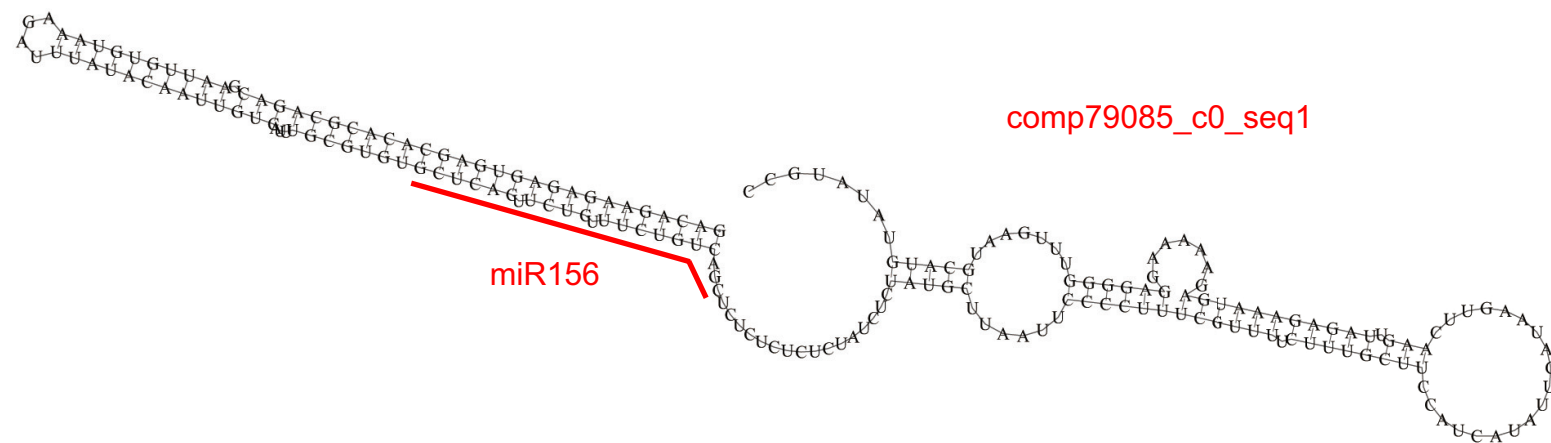

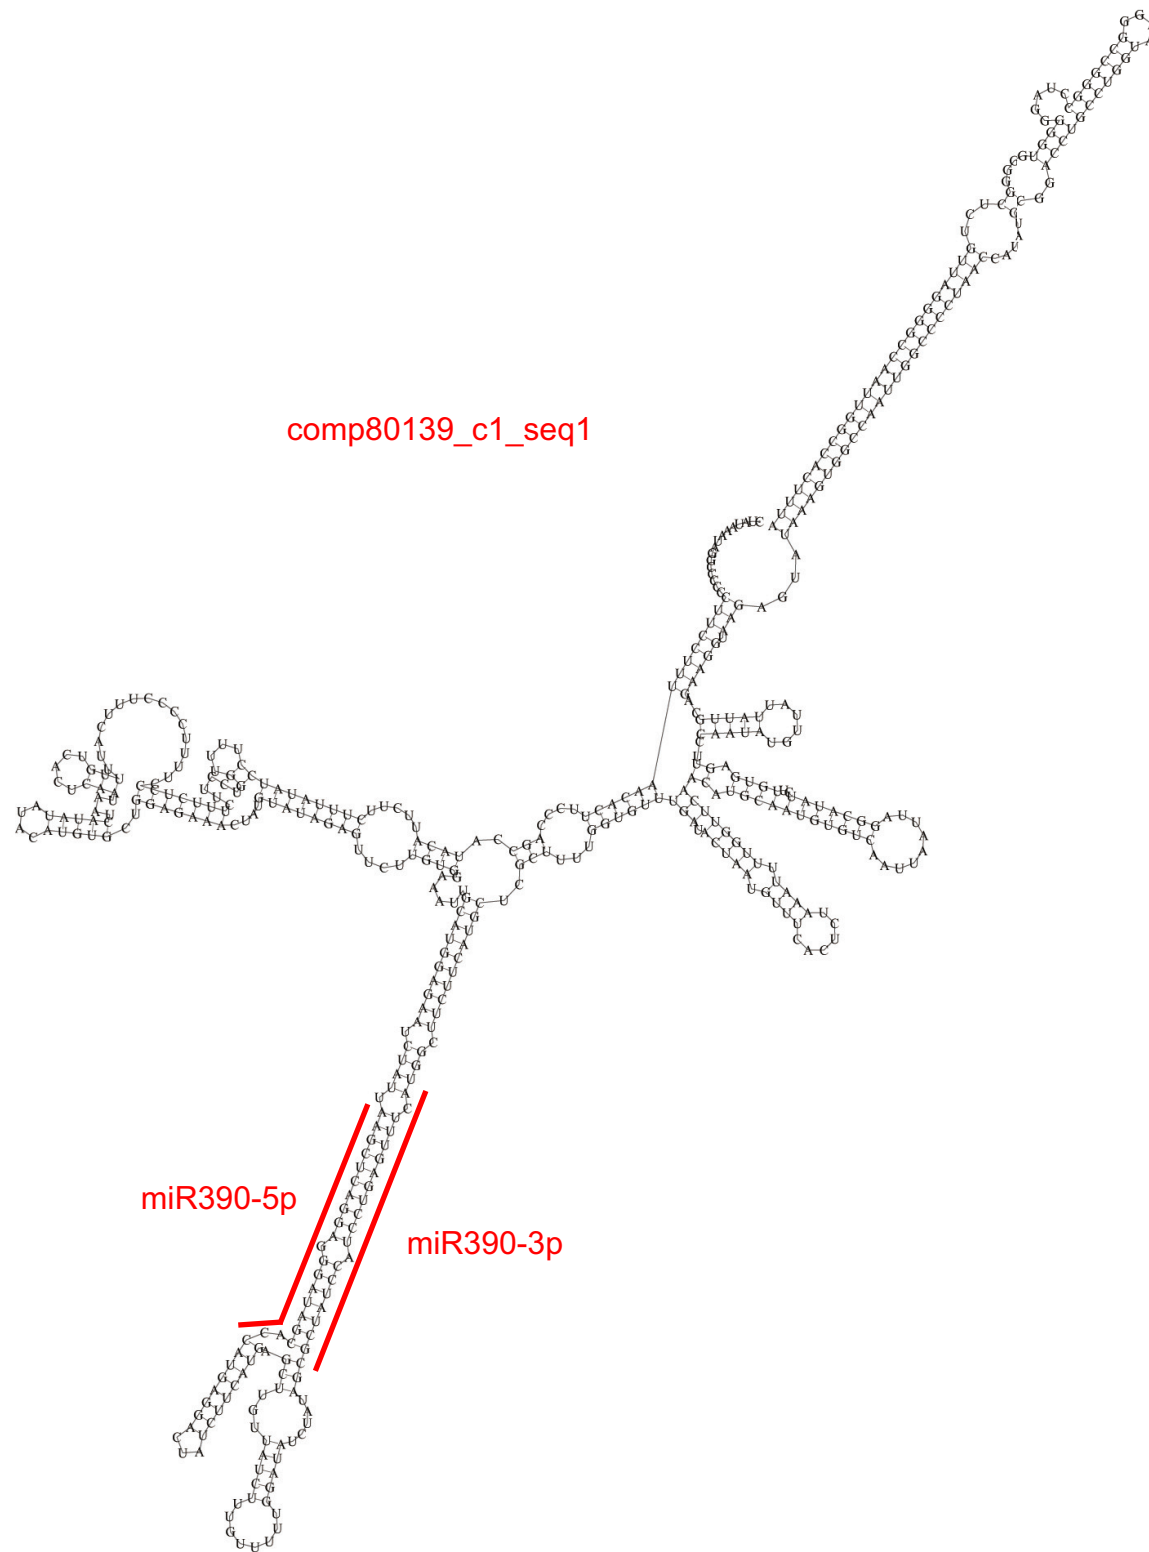

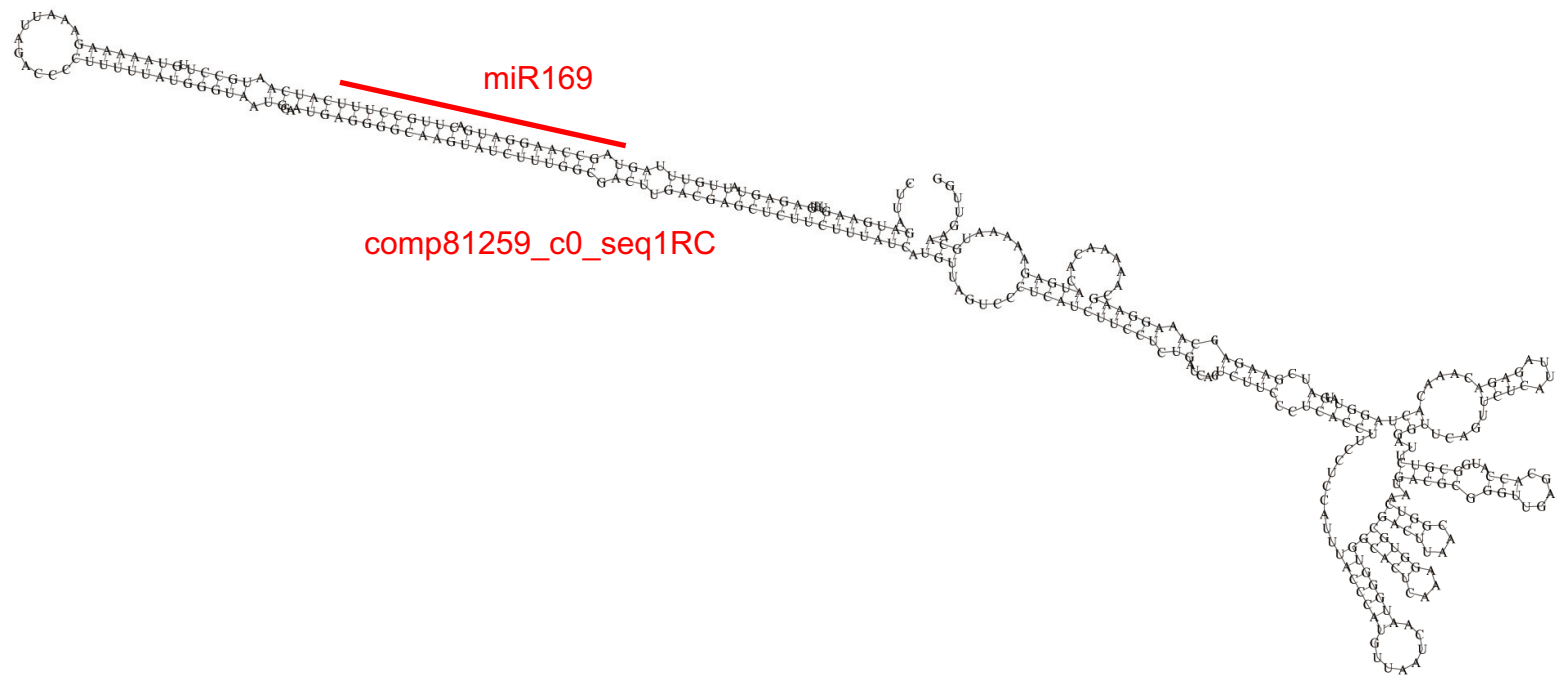

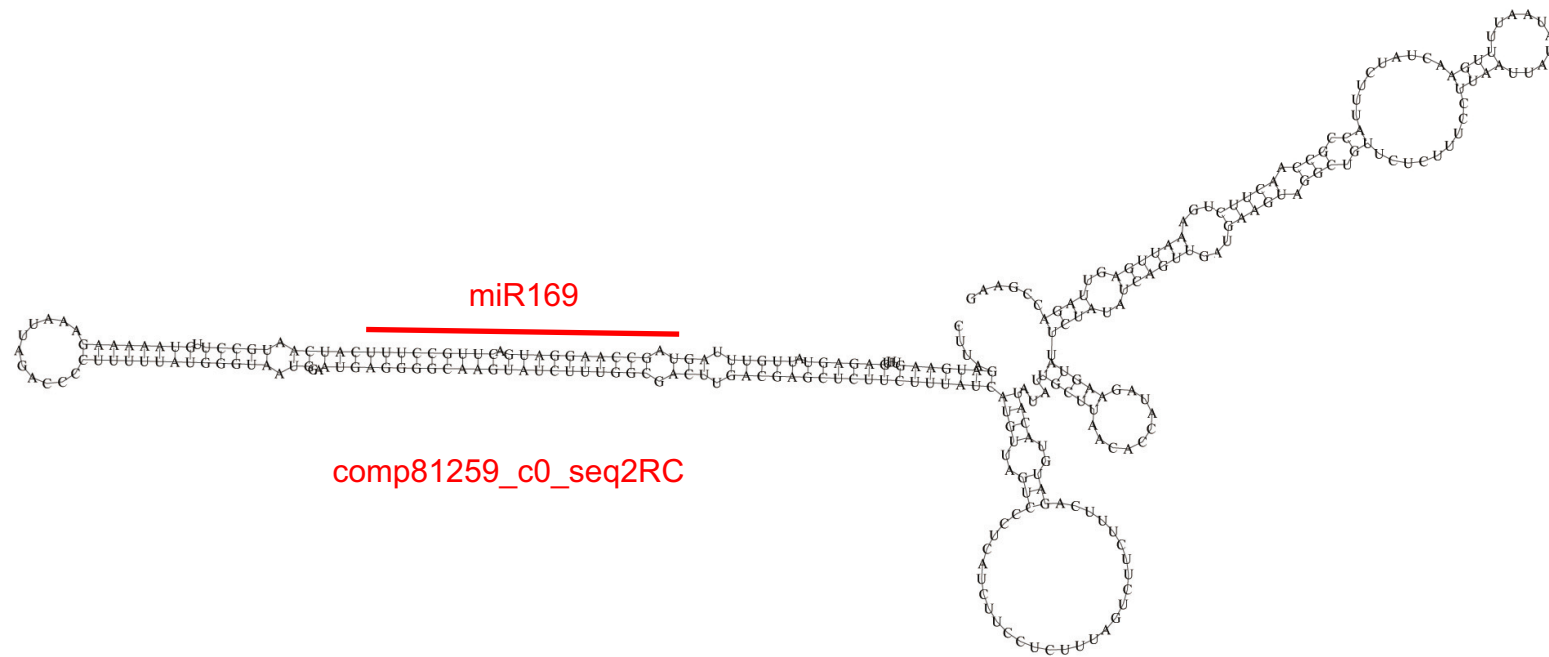

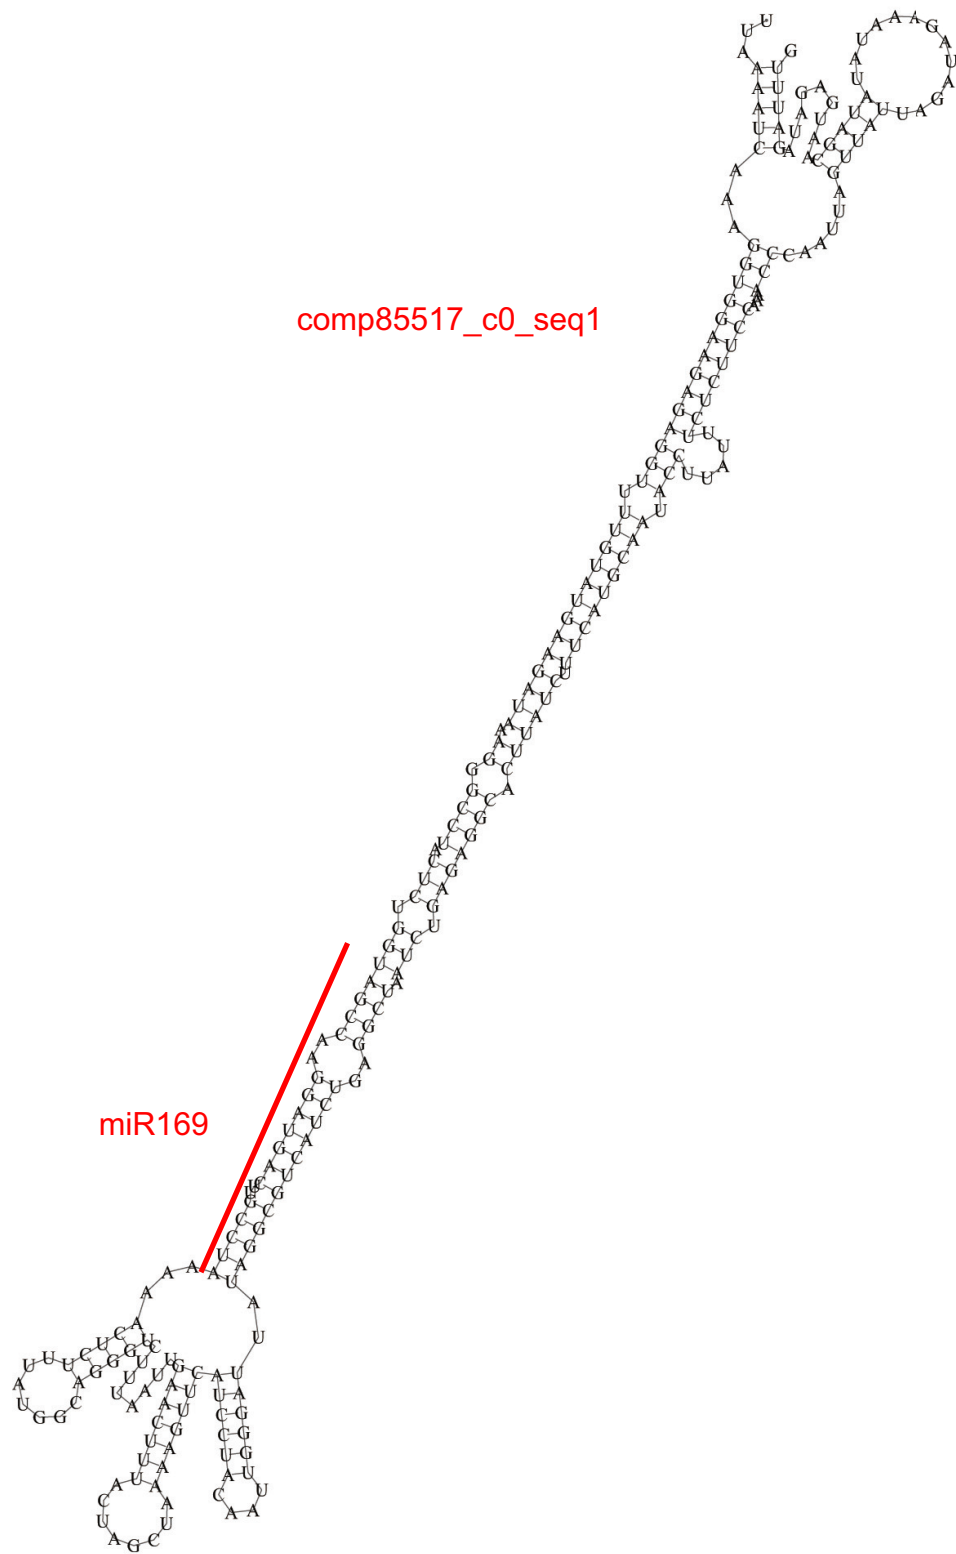

Supplement: Supplementary file 2 [file 1]
